# Supplementary material for: Energetic salts based on 1-methoxy-5-nitroiminotetrazole
Source: Royal Society of Chemistry journal article supplement (doi:10.1039/c3nj41117f), 2013-01-01
Supplement: c3nj41117f.pdf [file c3nj41117f.pdf]

## Electronic Supplementary Information

### Energetic salts based on 1-methoxy-5-nitroiminotetrazole

Young-Hyuk Joo,<sup>\*†</sup> Jin Hyuk Chung,<sup>‡</sup> Soo Gyeong Cho,<sup>‡</sup> Eun Mee Goh<sup>‡</sup>

<sup>†</sup> Department of Energetic Materials & Pyrotechnics,  
Hanwha Corporation Defence R&D Center, Daejeon, 305-156 (Korea)  
E-mail: joo2011@hanwha.co.kr

<sup>‡</sup> Defense Advanced R&D Center, Agency for Defense Development, Daejeon, 305-600  
(Korea)

## Table of contents

**Part A:** DSC, IR, <sup>1</sup>H, <sup>13</sup>C <sup>15</sup>N NMR spectra

**Part B:** Hydrogen bonding of 5–11

**Part C:** Calculation information

# DSC, IR, <sup>1</sup>H NMR, <sup>13</sup>C NMR <sup>15</sup>N NMR Spectra

## <sup>1</sup>H NMR

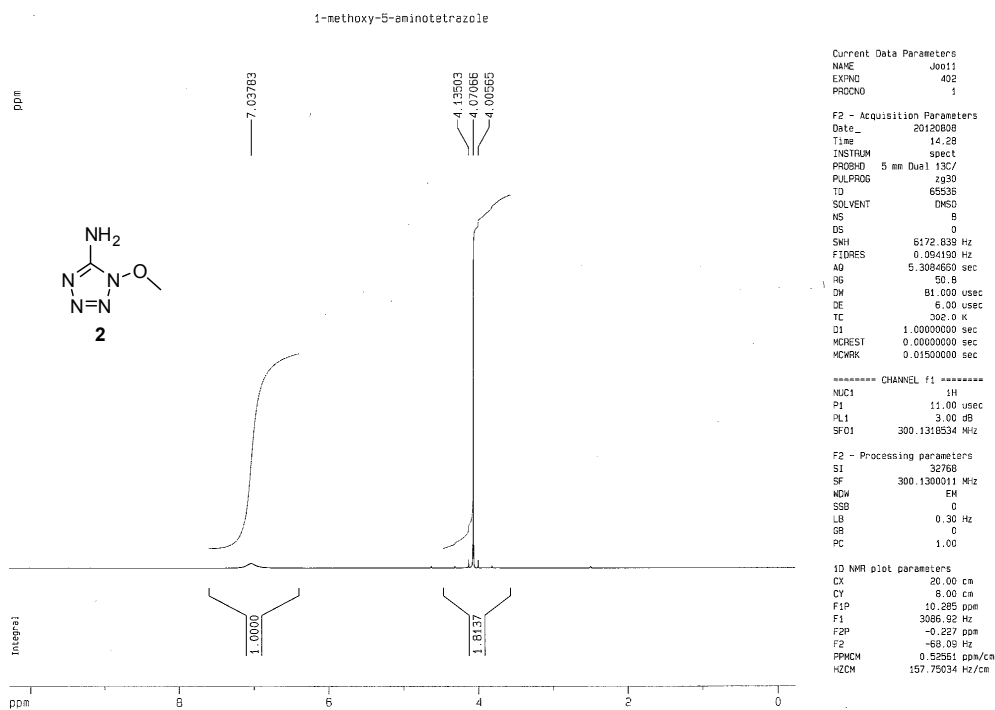

## <sup>13</sup>C NMR

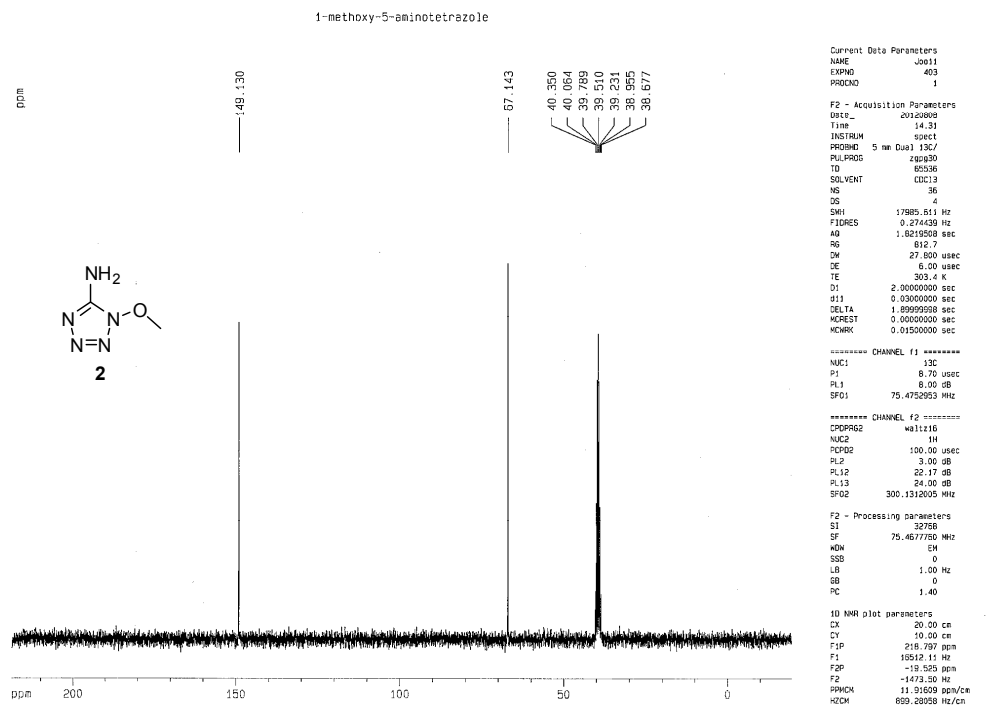

# <sup>1</sup>H NMR

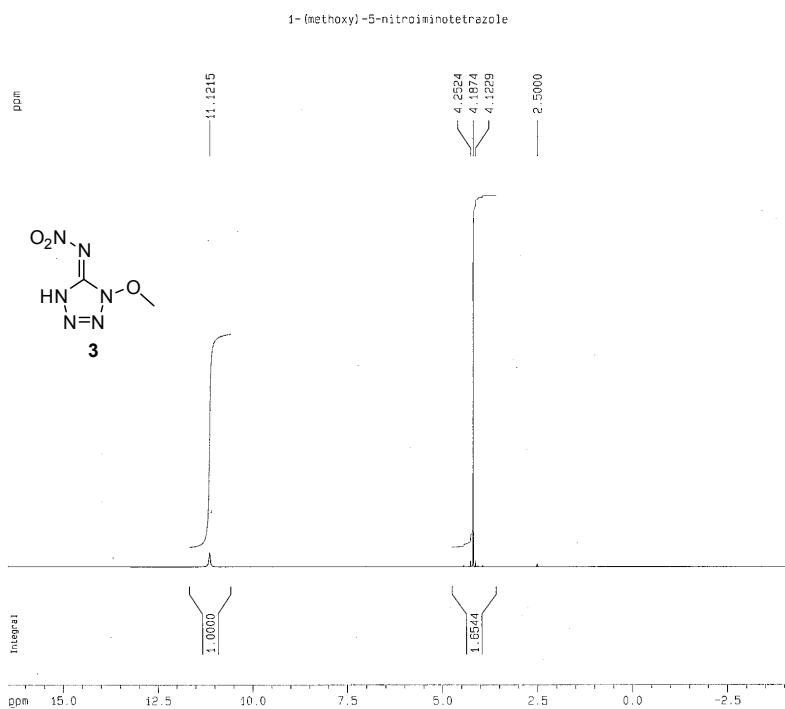

# <sup>13</sup>C NMR

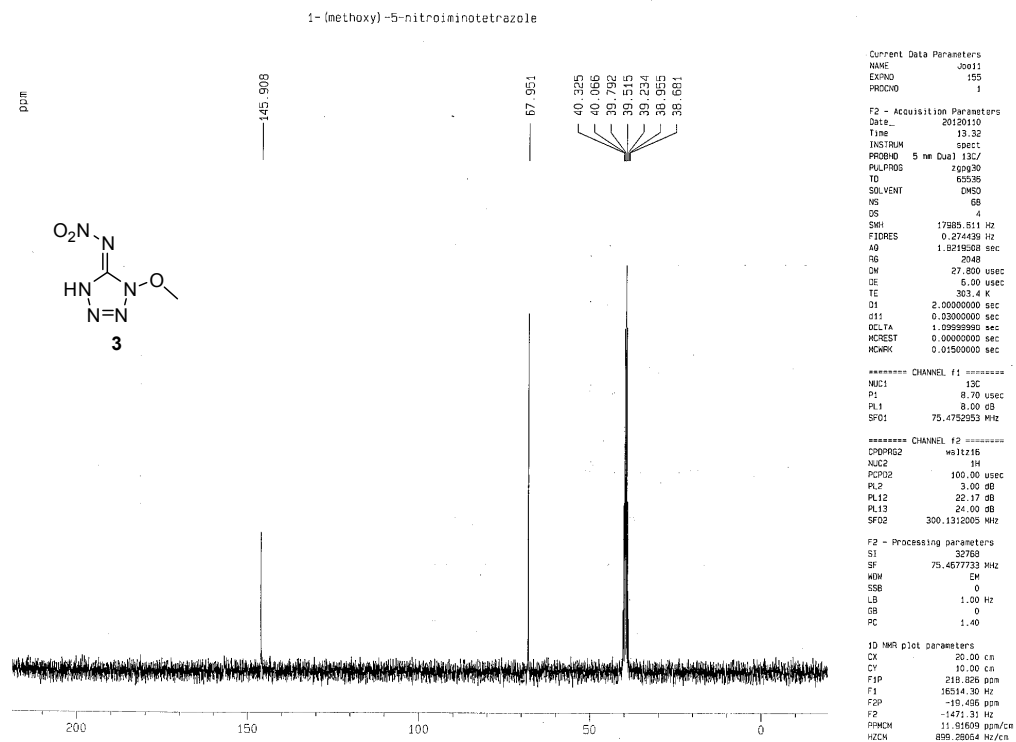

## DSC

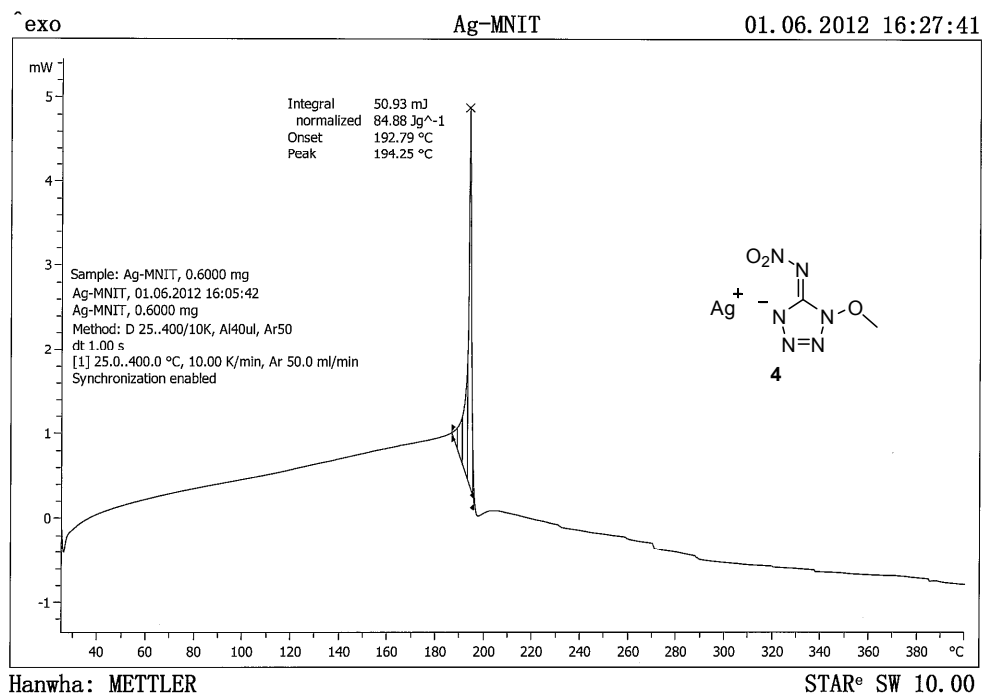

## IR

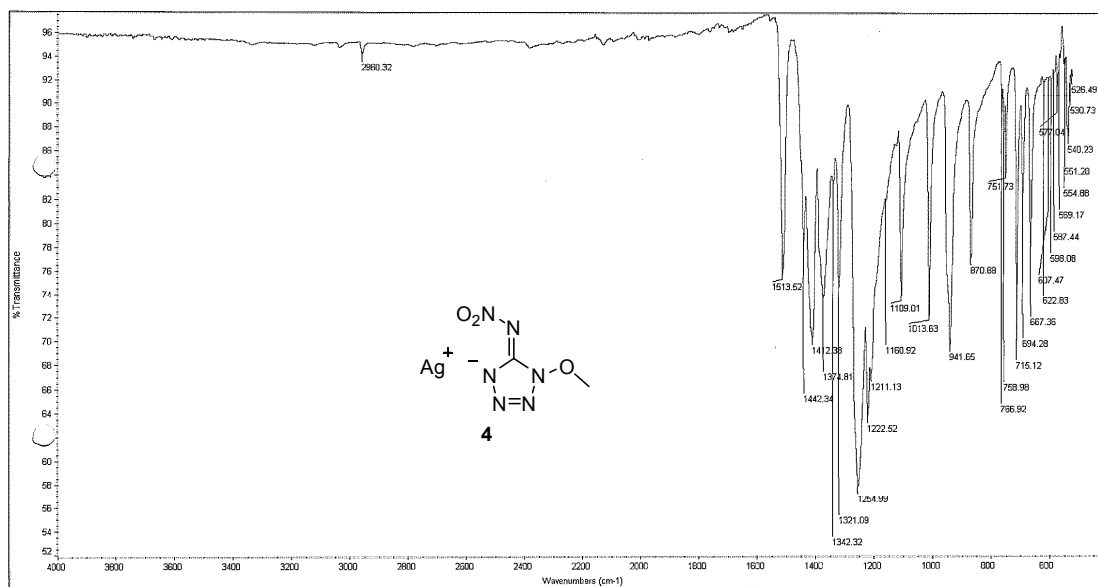

## DSC

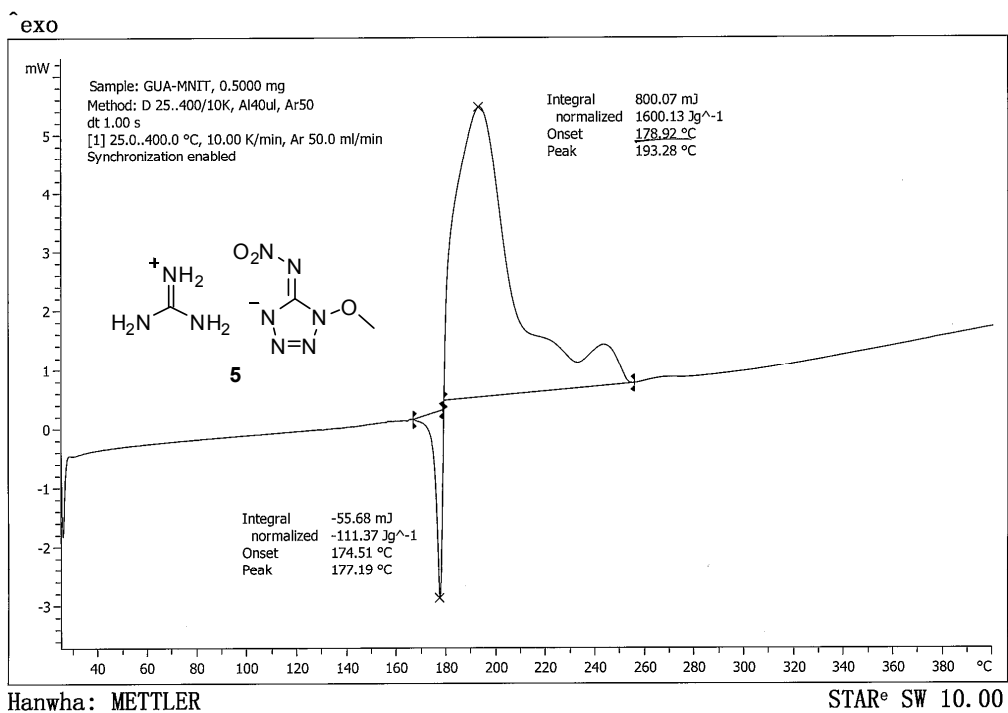

## IR

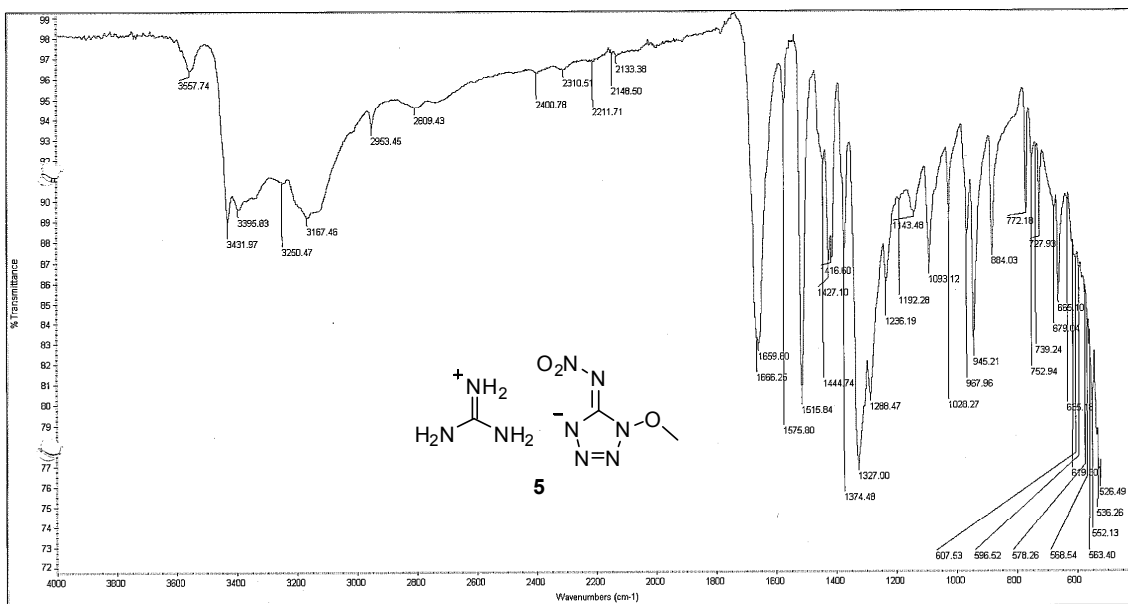

## <sup>1</sup>H NMR

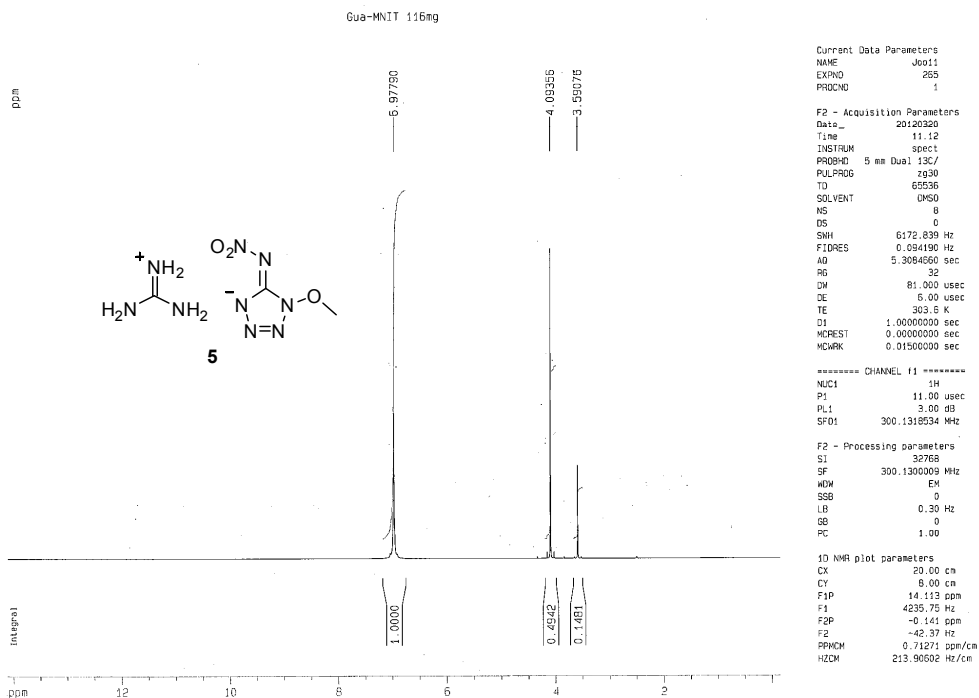

## <sup>13</sup>C NMR

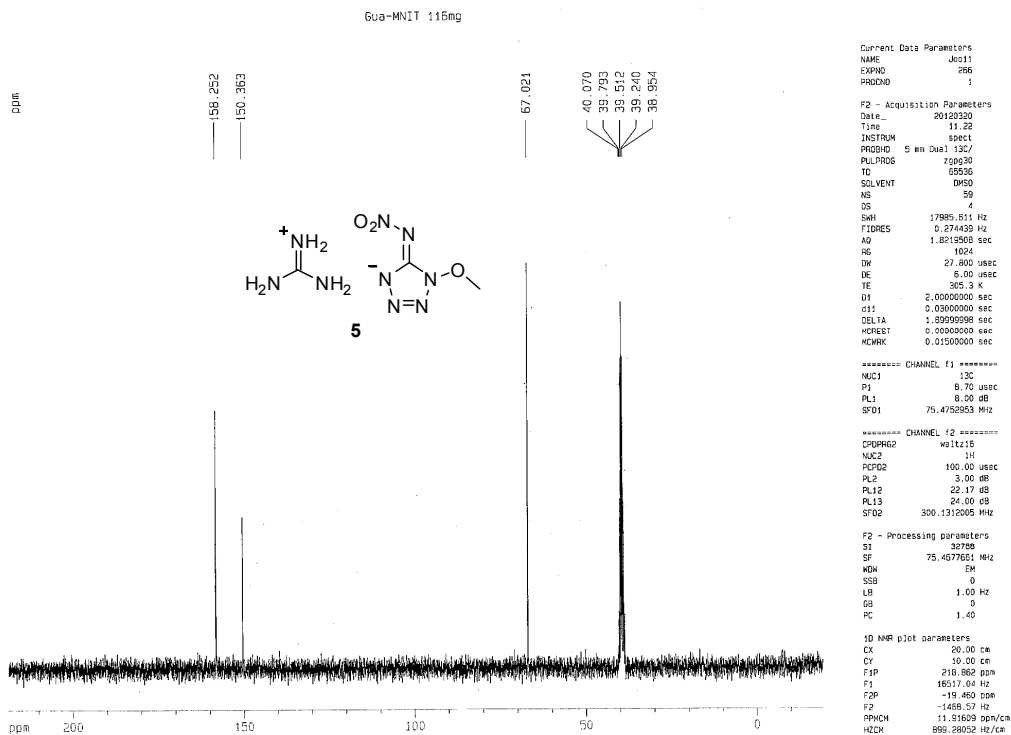

## <sup>15</sup>N NMR

Gua-MNIT

Sample Name:

Data Collected on:  
 Agilent-MNR-vmars600

Archive directory:

Sample directory:

FidFile: N15\_Gua\_MNIT

Pulse Sequences: s2pul  
 Solvent: dms0  
 Data collected on: May 30 2012

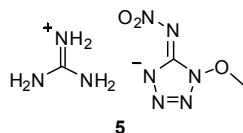

Agilent Technologies

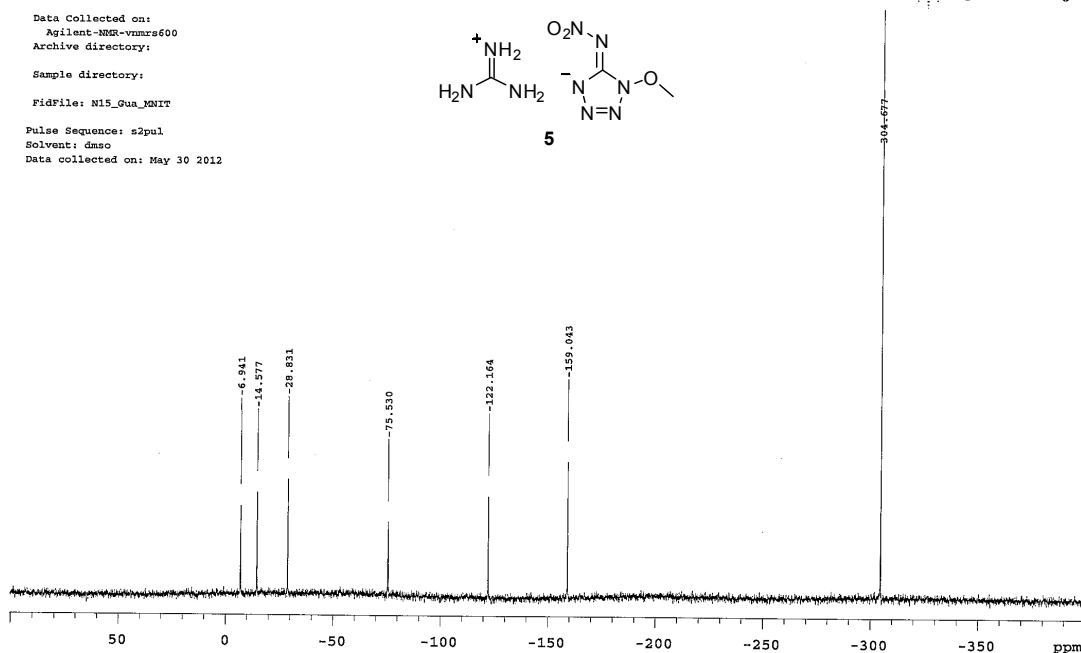

## DSC

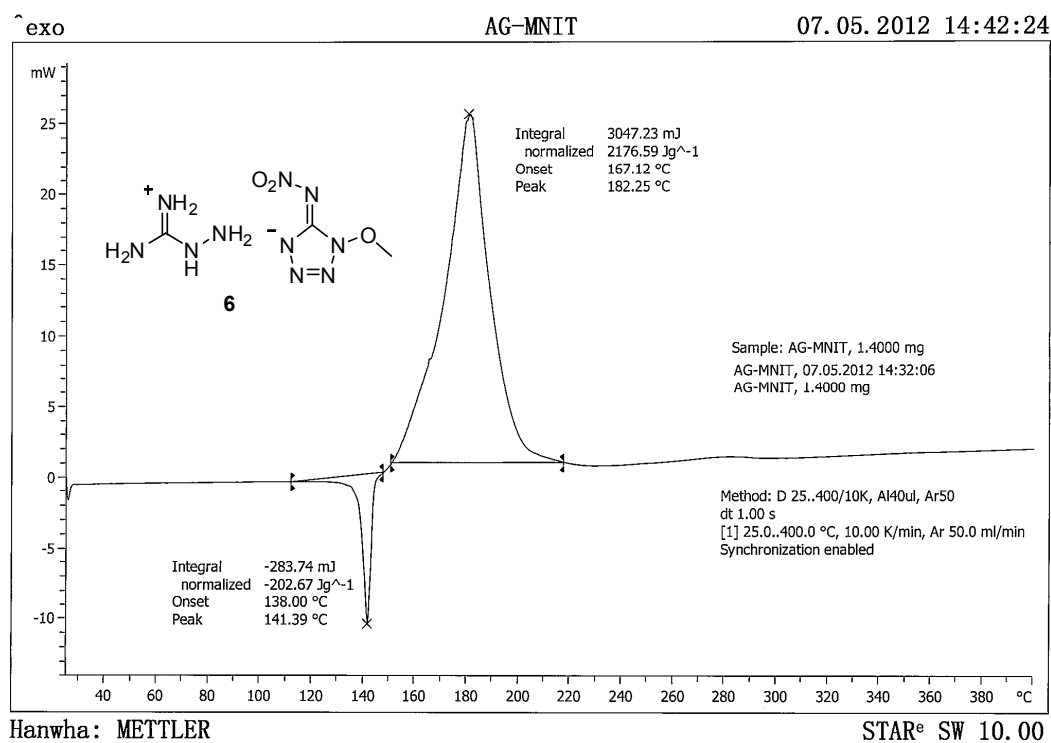

## IR

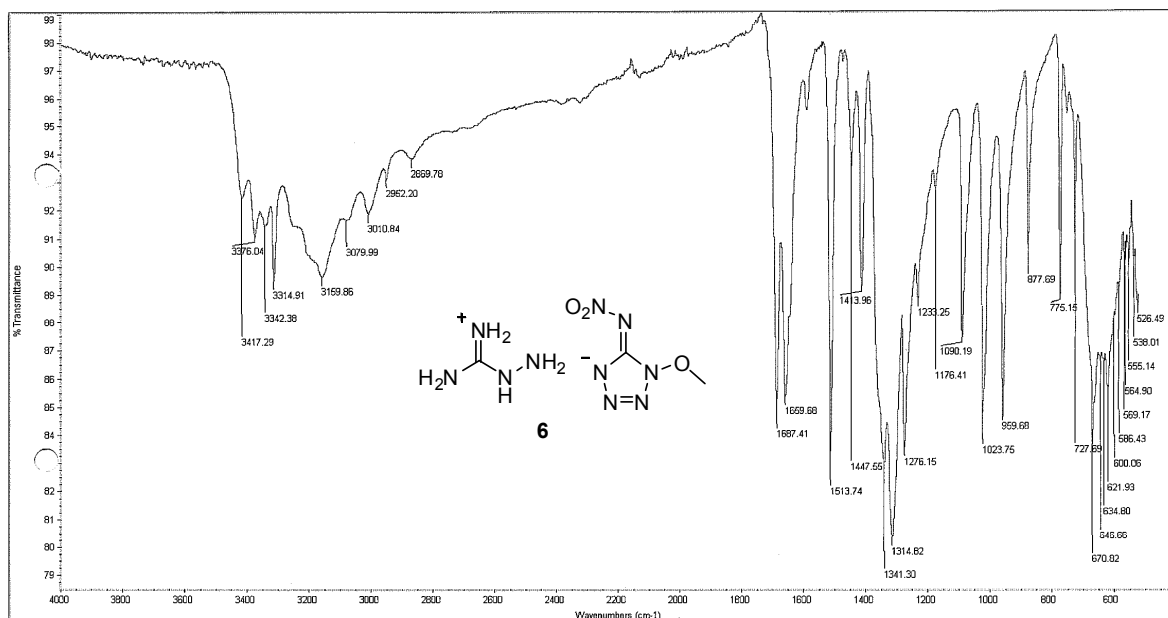

## <sup>1</sup>H NMR



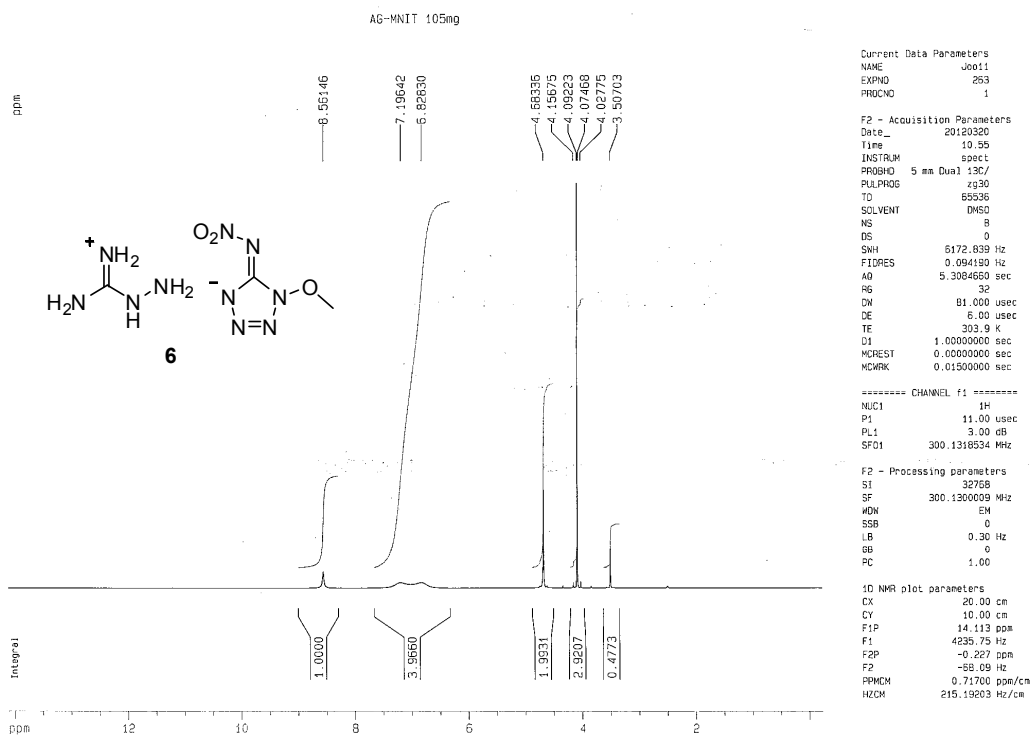

### <sup>13</sup>C NMR

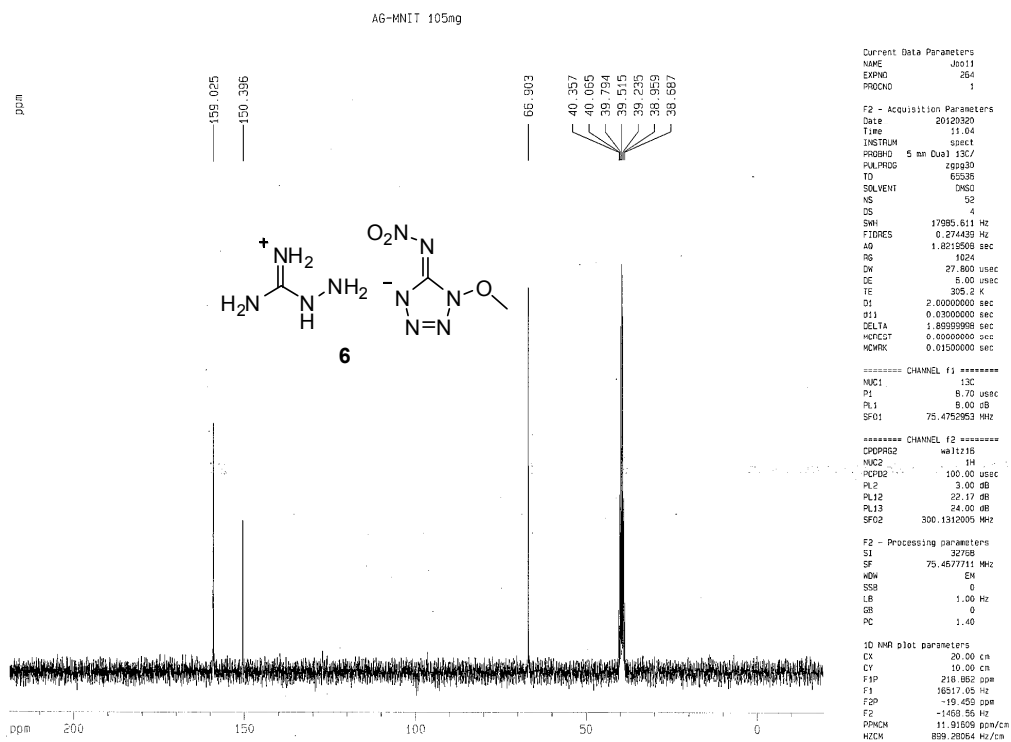

## <sup>15</sup>N NMR

AG-MNIT

Sample Name:

Data Collected on:  
 Agilent-NMR-vnmrs600  
 Archive directory:

Sample directory:

Fidfile: N15\_AG\_MNIT

Pulse Sequence: s2pul  
 Solvent: dmso  
 Data collected on: May 30 2012

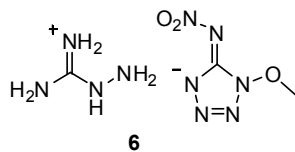

Agilent Technologies

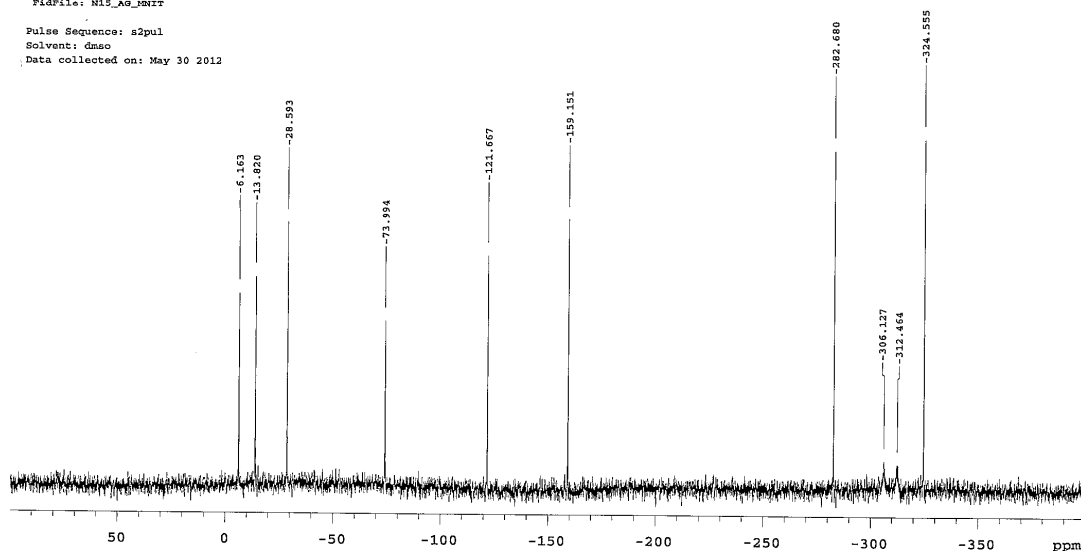

## DSC

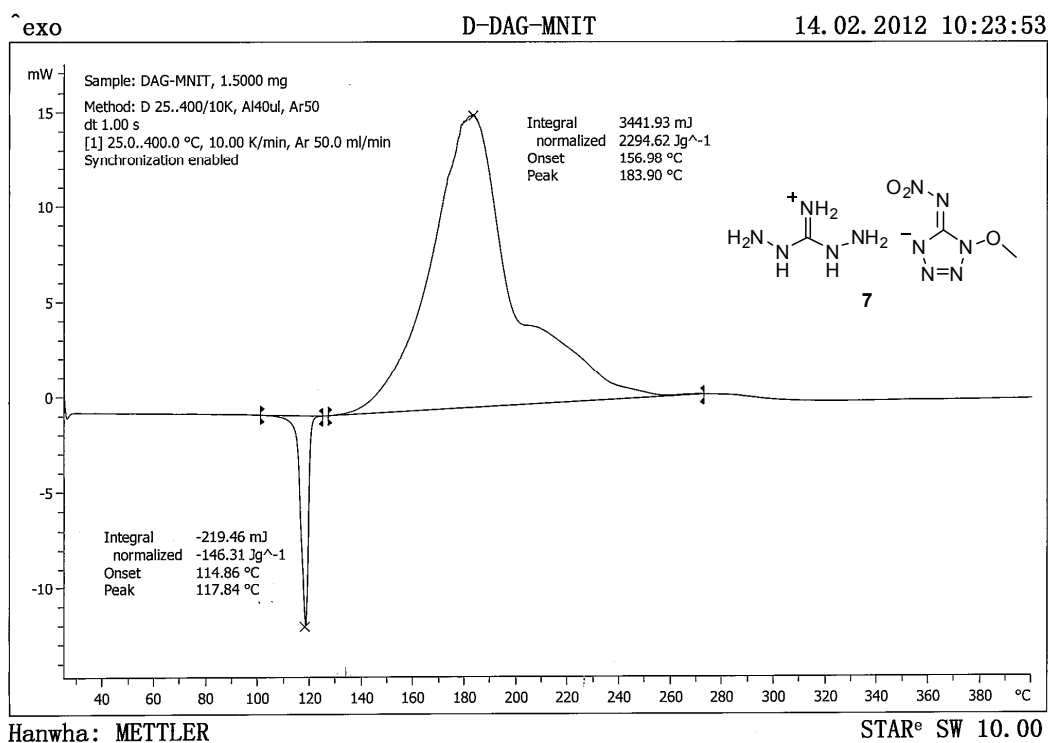

## IR

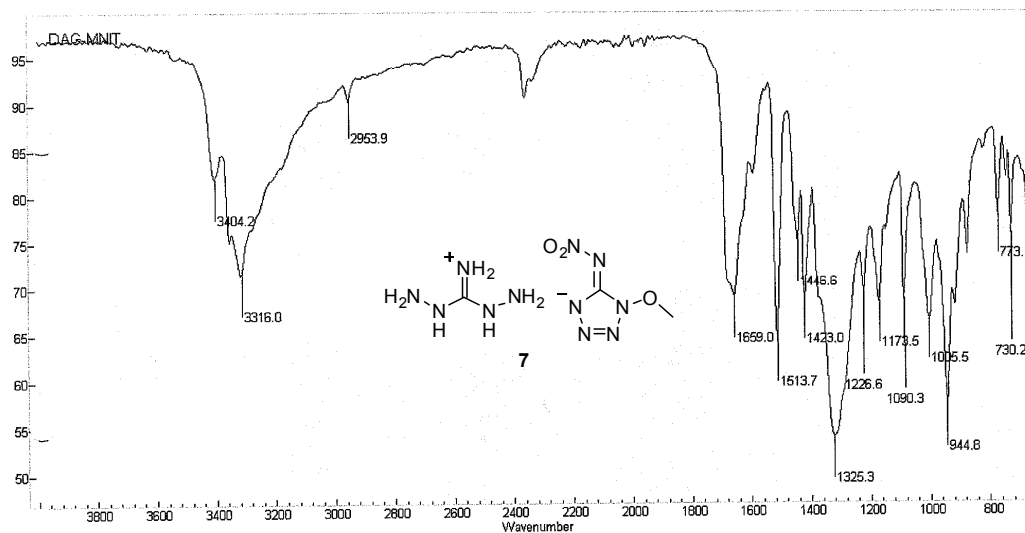

## <sup>1</sup>H NMR

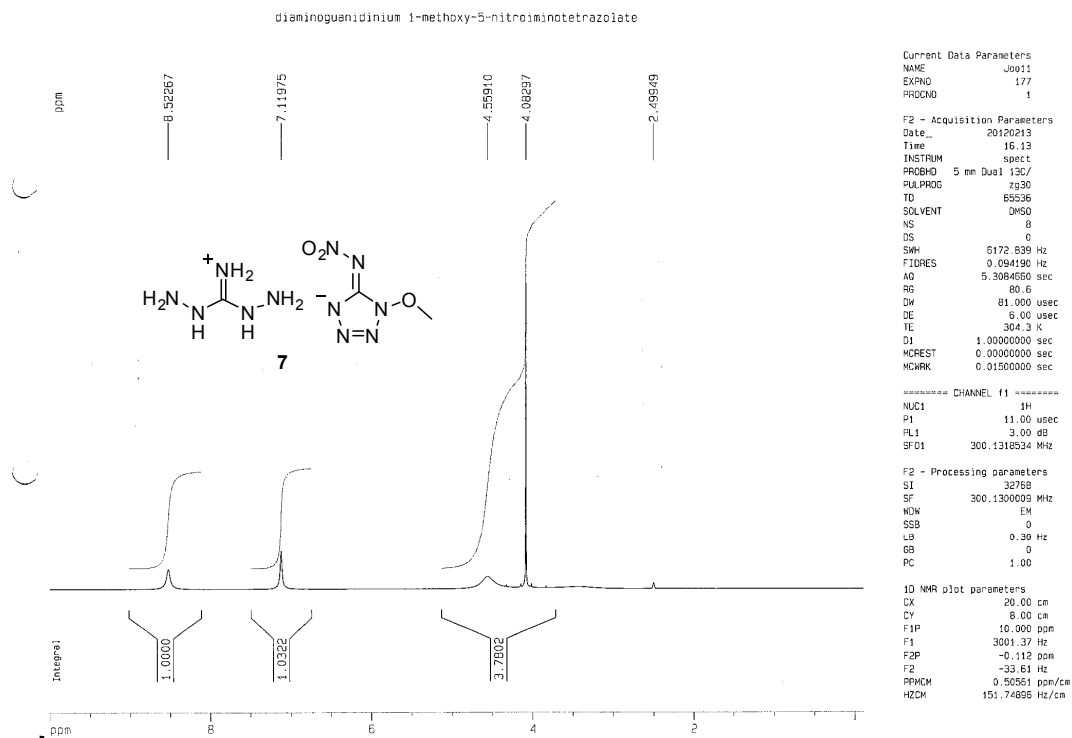

### $^{15}\text{N}$ NMR

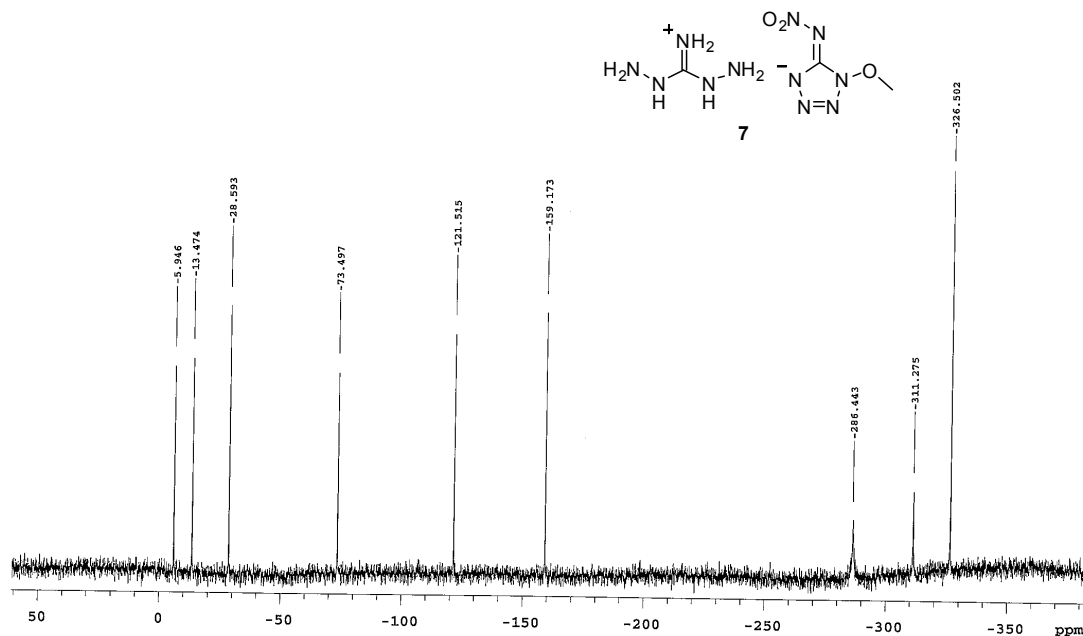

### DSC

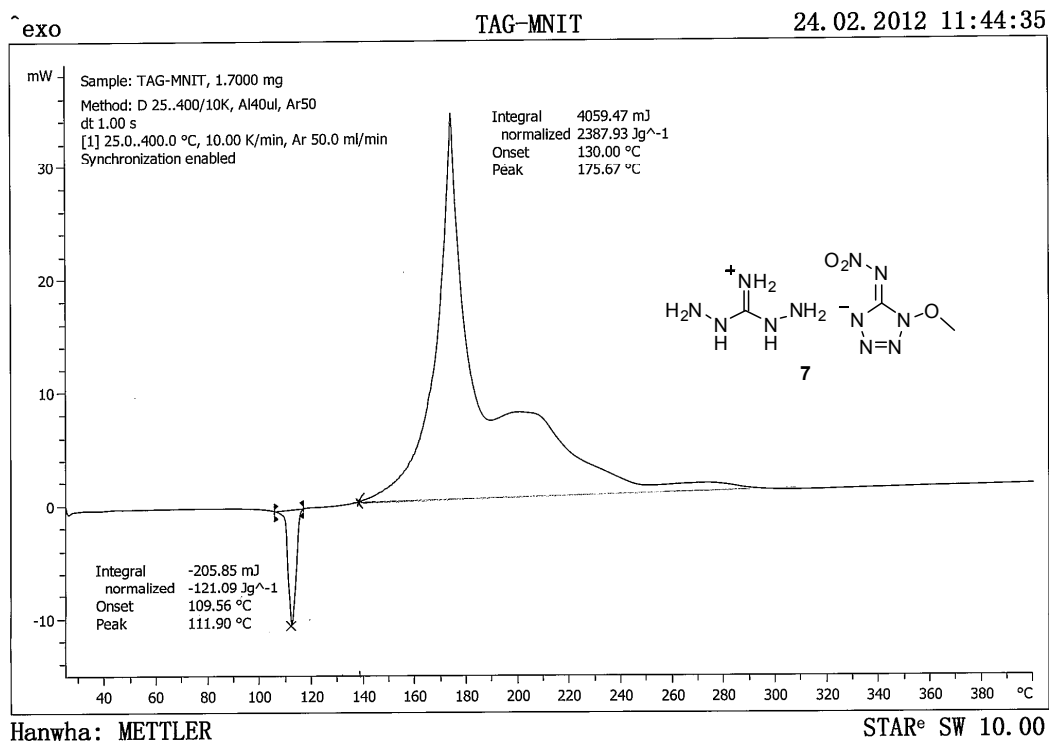

## IR

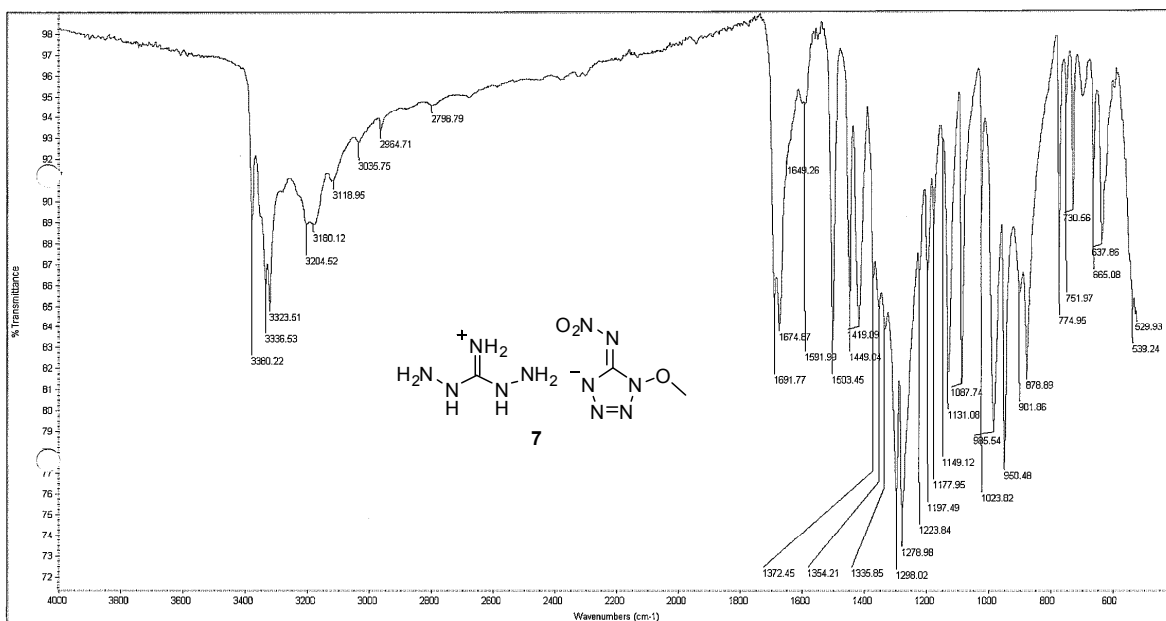

## <sup>1</sup>H NMR

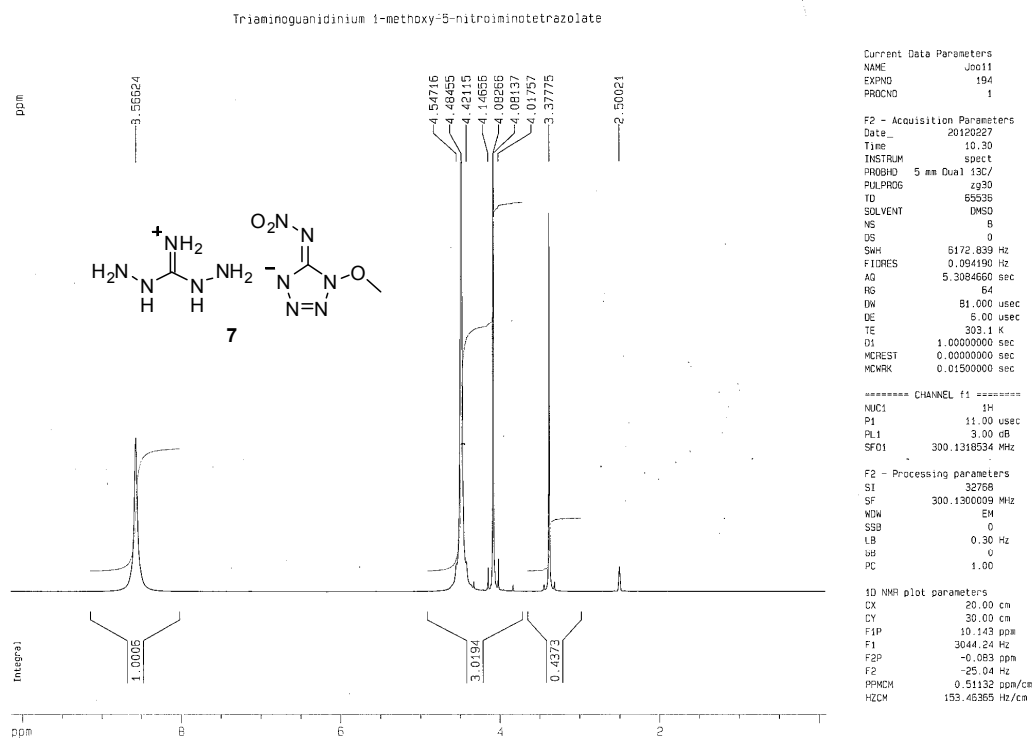

### <sup>13</sup>C NMR

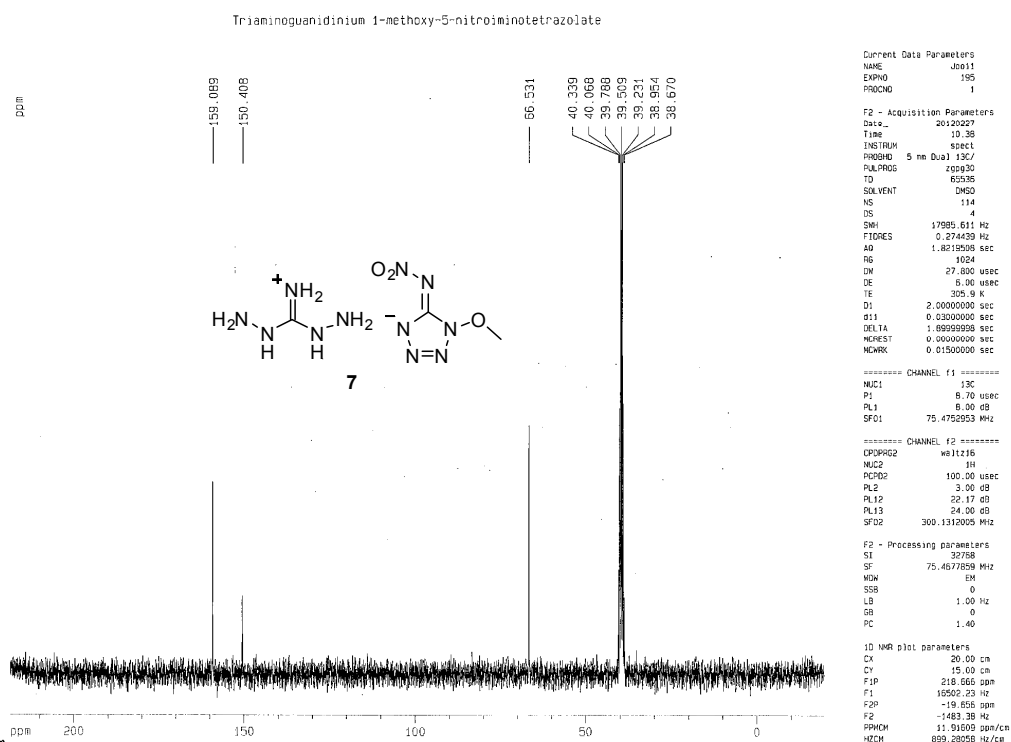

### <sup>15</sup>N NMR

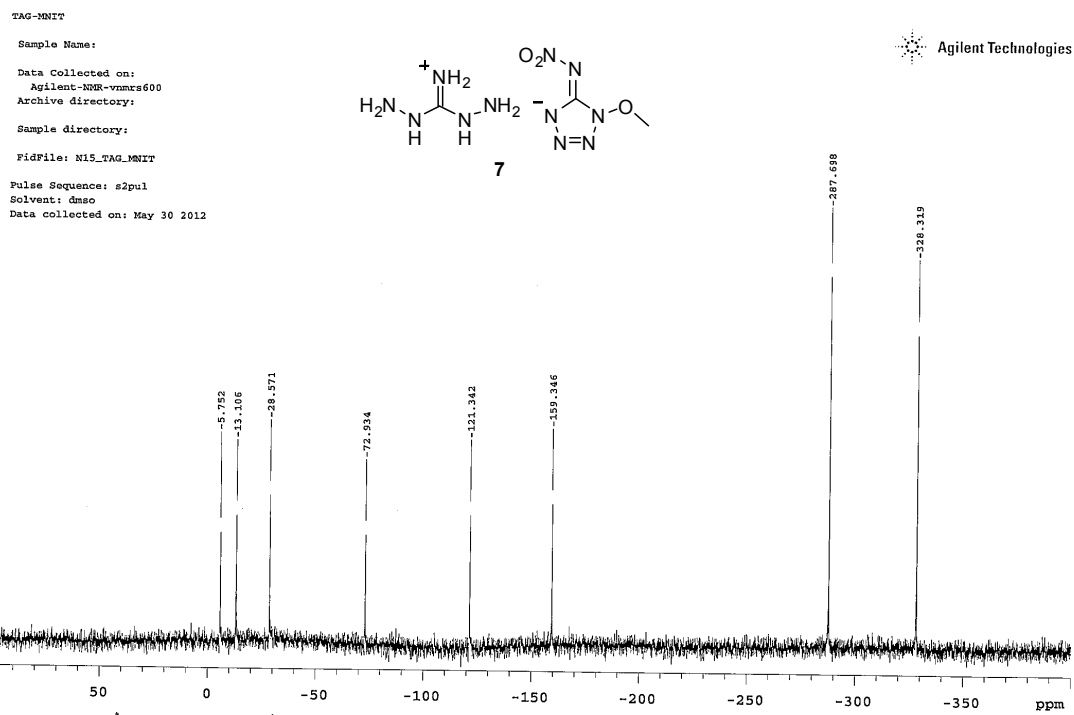

## DSC

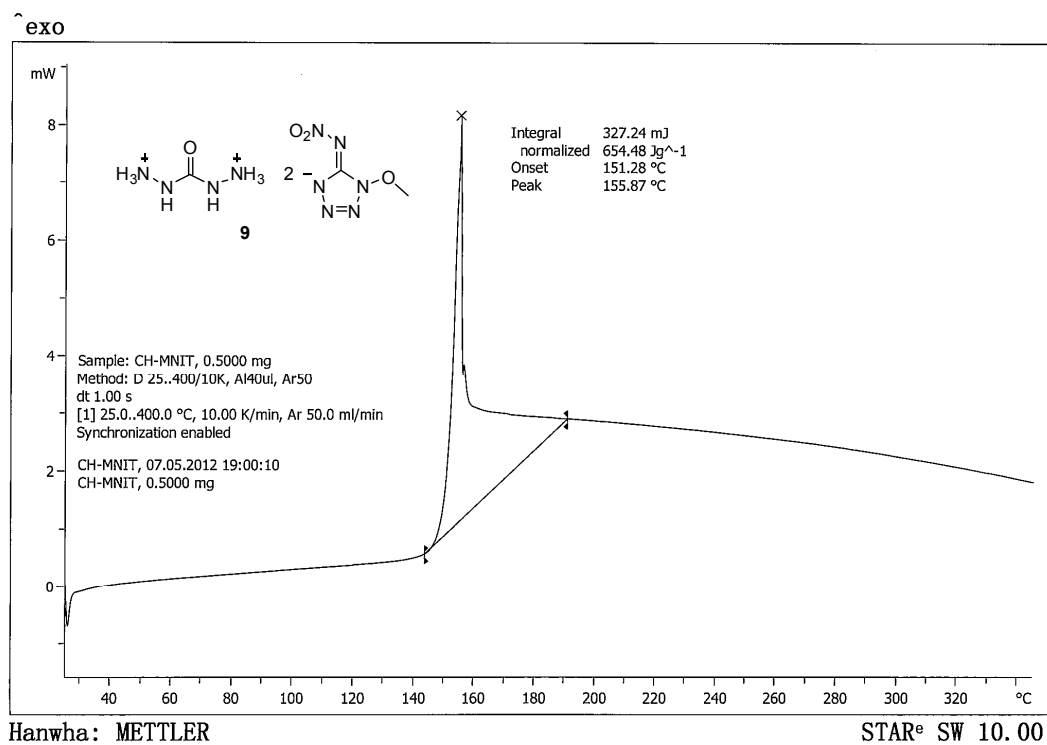

## IR

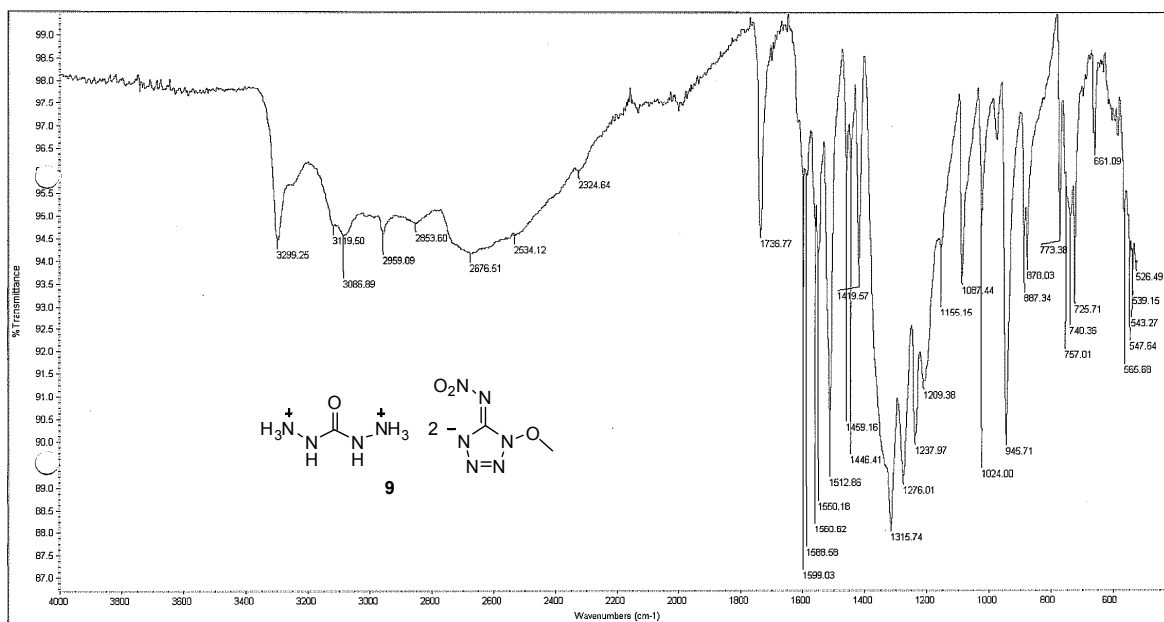

# <sup>1</sup>H NMR

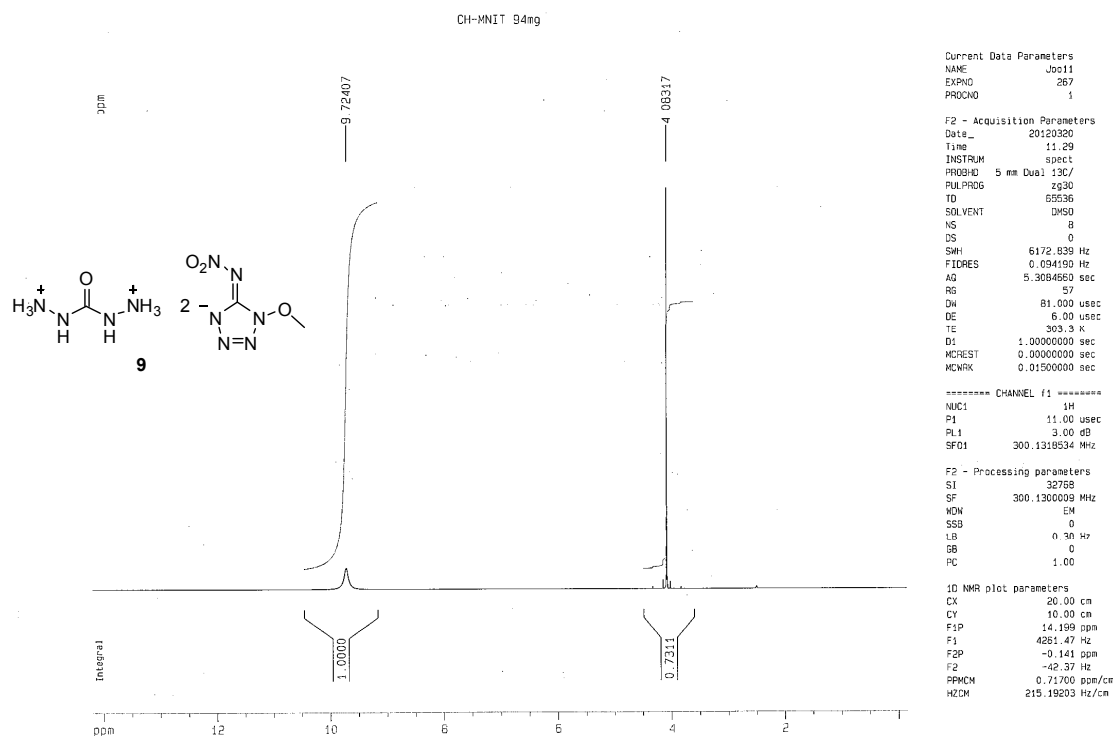

# <sup>13</sup>C NMR

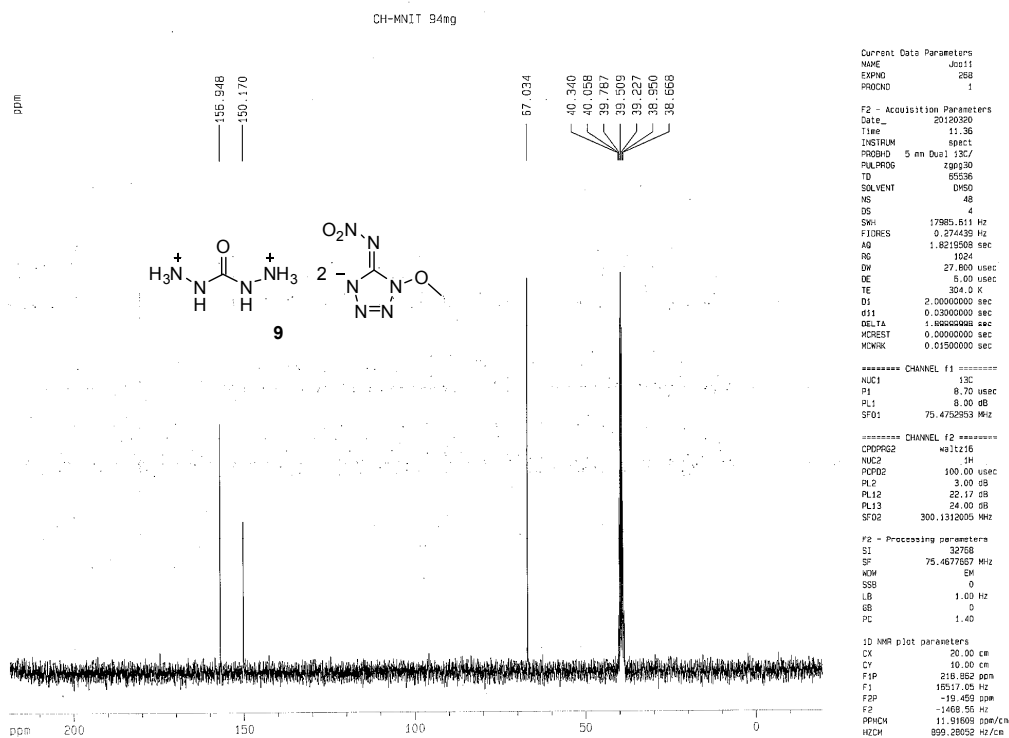



## <sup>15</sup>N NMR

CH-MNIT

Sample Name:

Data Collected on:  
Agilent-NMR-vnmrs600

Archive directory:

Sample directory:

FidFile: N15\_CH\_MNIT

Pulse Sequence: s2pul

Solvent: dmso

Data collected on: May 30 2012

Agilent Technologies

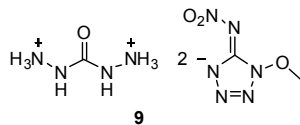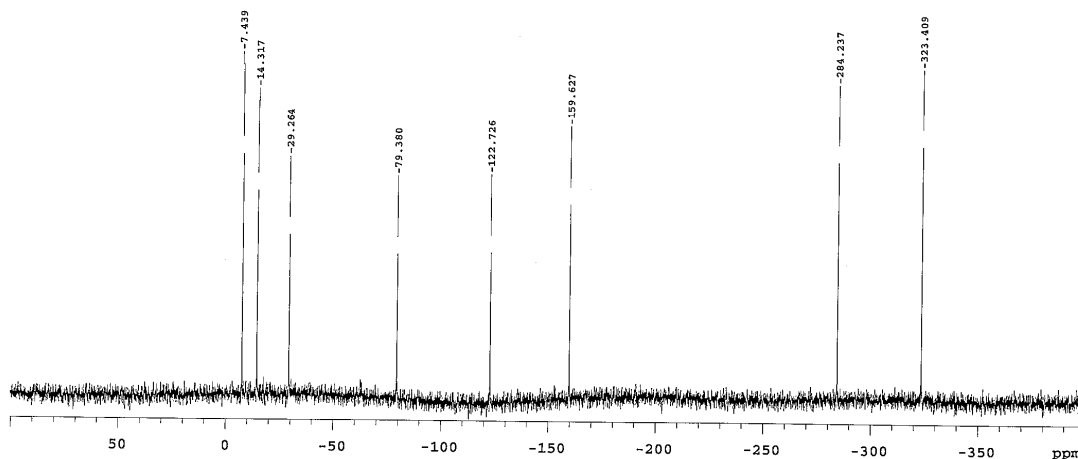

## DSC

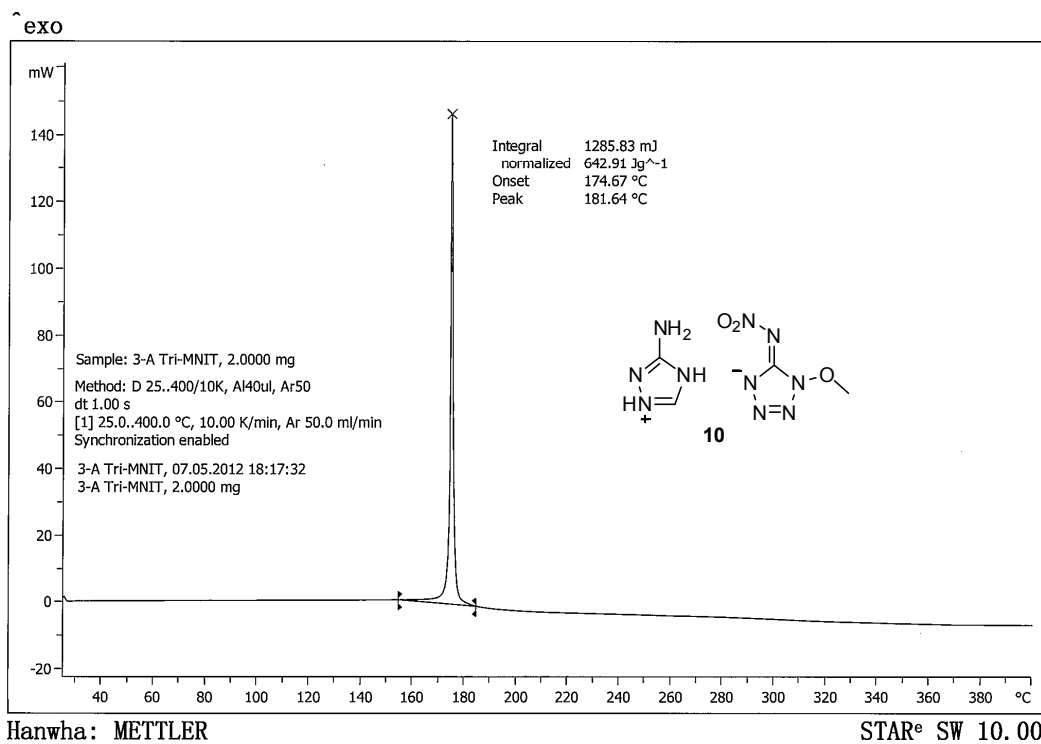

## IR

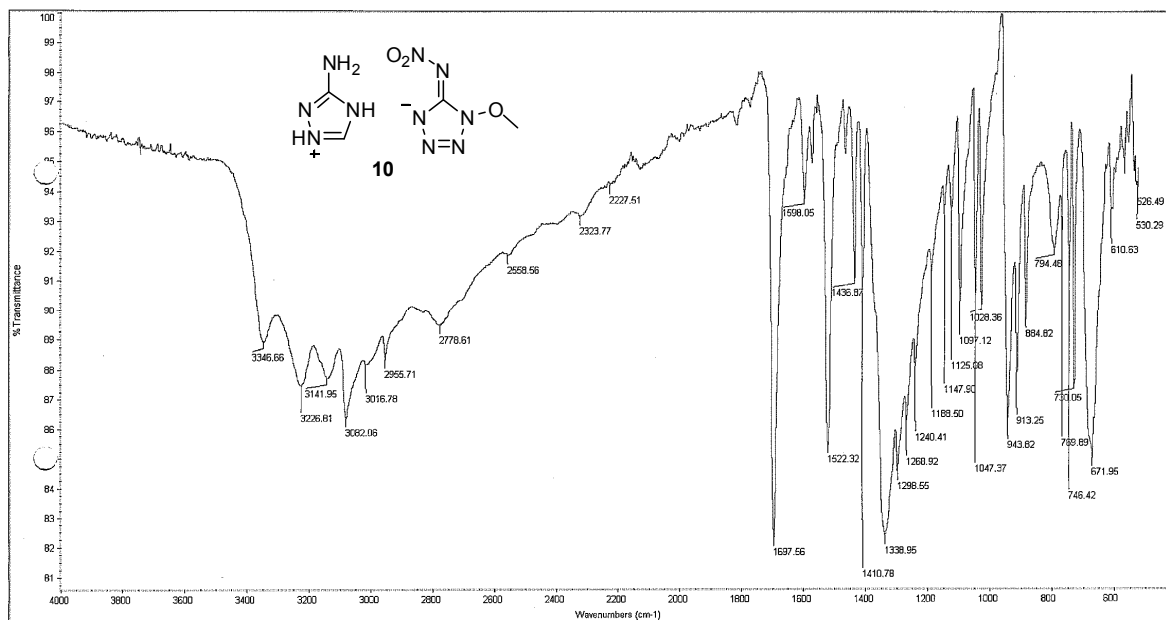

## <sup>1</sup>H NMR

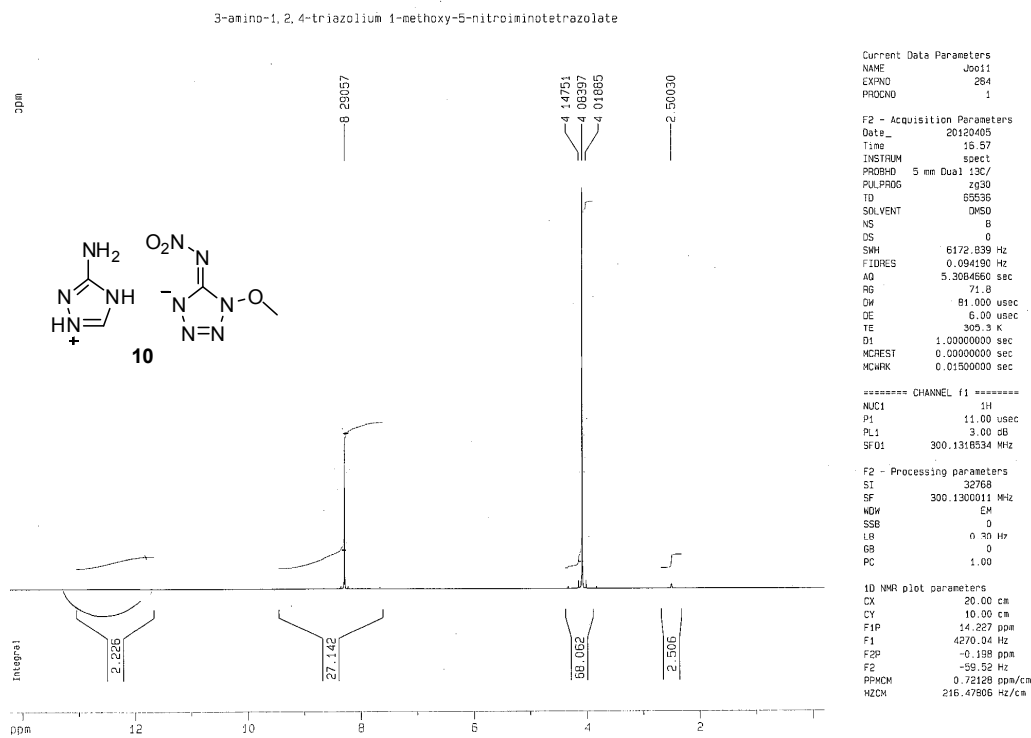

### <sup>13</sup>C NMR

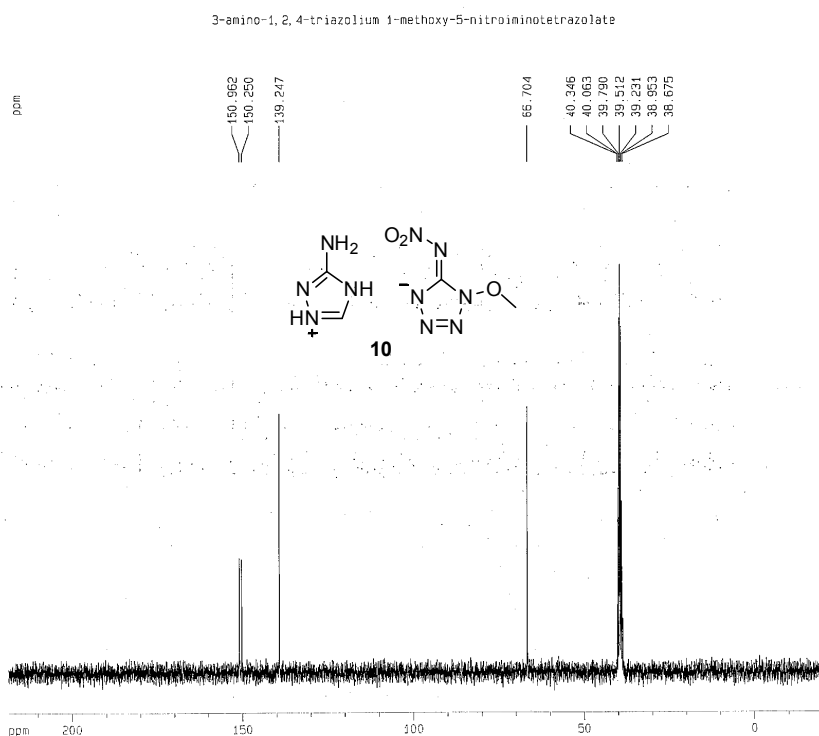

Current Data Parameters  
 NAME Job11  
 EXPNO 285  
 PROCNO 1

F2 - Acquisition Parameters  
 Date\_ 20120405  
 Time 17.33  
 INSTRUM spect  
 PROBD 5 mm Dui1 13C/  
 PULPROG zgpg30  
 TO 55536  
 SOLVENT DMSO  
 NS 80  
 DS 4  
 SWH 17585.611 Hz  
 FIDRES 0.274439 Hz  
 AQ 1.821958 sec  
 RG 1824.6  
 DW 27.800 usec  
 DE 6.00 usec  
 TE 307.6 K  
 D1 2.0000000 sec  
 D11 0.2000000 sec  
 DELTA 1.8000000 sec  
 MCREST 0.0000000 sec  
 MDMR 0.01500000 sec

===== CHANNEL f1 =====  
 NUC1 13C  
 P1 9.70 usec  
 PL1 8.00 dB  
 SF01 75.4782953 MHz

===== CHANNEL f2 =====  
 CPDPRG2 waltz16  
 NUC2 1H  
 PCPD2 100.00 usec  
 PL2 3.00 dB  
 PL12 22.17 dB  
 PL13 24.00 dB  
 SF02 300.1312003 MHz

F2 - Processing parameters  
 S1 32768  
 SF 75.4577798 MHz  
 WDW EM  
 SSB 0  
 LB 1.00 Hz  
 GB 0  
 PC 1.40

1D NMR plot parameters  
 CX 20.00 cm  
 CV 10.00 cm  
 F1P 218.852 ppm  
 F1 16517.04 Hz  
 F2P -19.450 ppm  
 F2 -1469.57 Hz  
 PPGM HZCM  
 HZCM 899.28070 Hz/cm

### <sup>15</sup>N NMR

3-ATri-MNTF

Sample Name:  
 Data Collected on:  
 Agilent-NMR-vnmrs600  
 Archive directory:  
 Sample directory:  
 FidFile: N15  
 Pulse Sequence: s2pul  
 Solvent: dmsc  
 Data collected on: May 30 2012

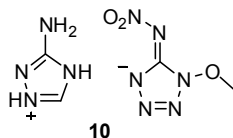

Agilent Technologies

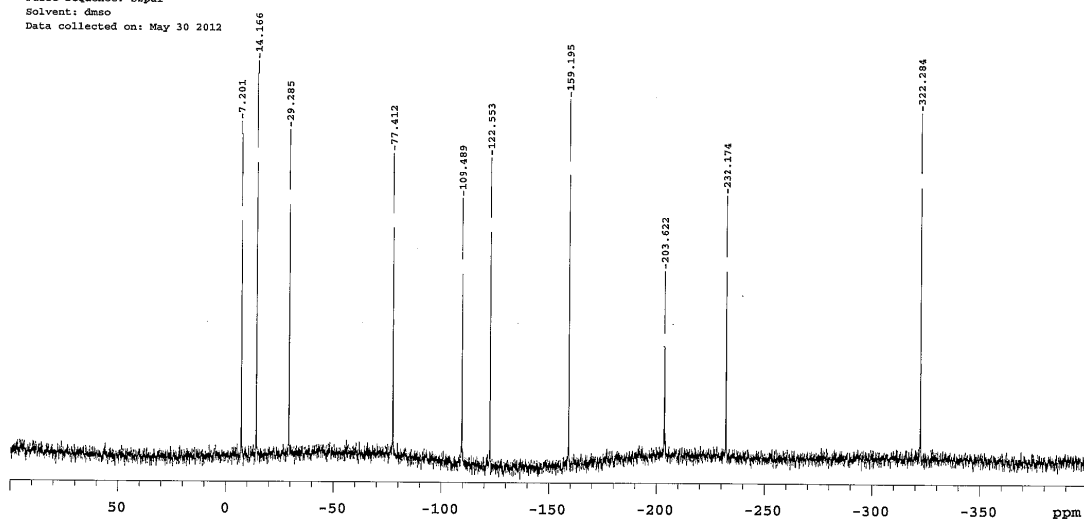

## DSC

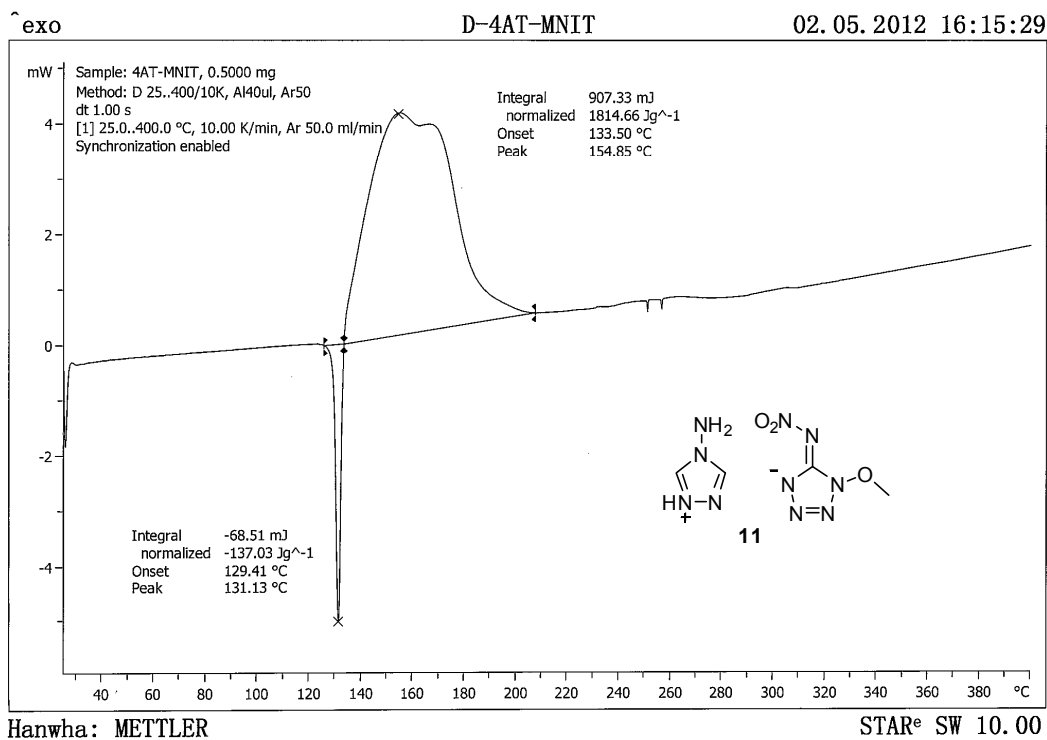

## <sup>1</sup>H NMR

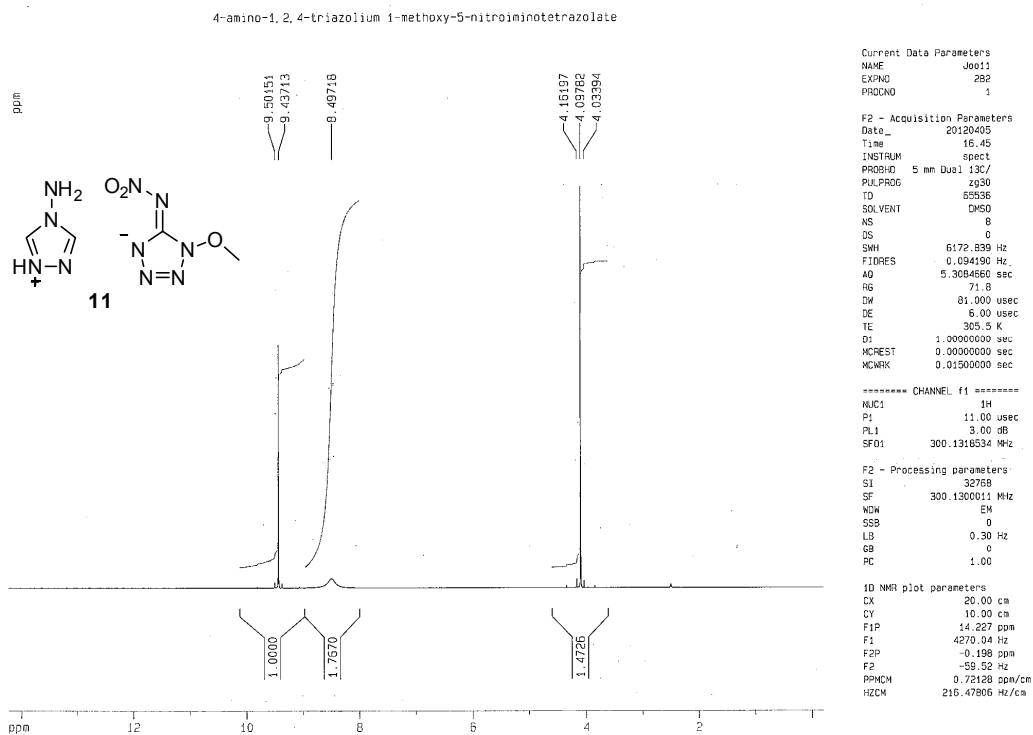

### <sup>13</sup>C NMR

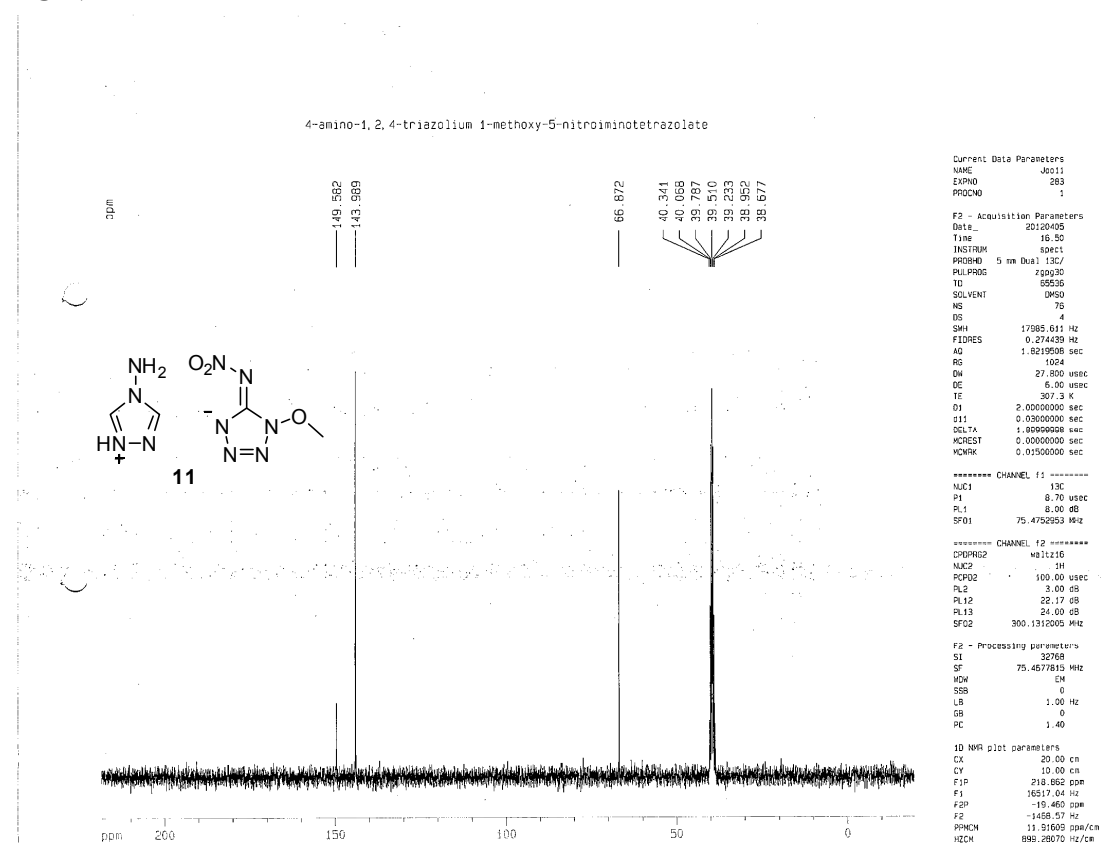

### <sup>15</sup>N NMR

4-ATRI-MNIT

Sample Name:

Data Collected on:  
 Agilent-NMR-vnmrs600  
 Archive directory:

Sample directory:  
 FidFile: N15\_4\_ATri\_MNIT

Pulse Sequence: s2pul  
 Solvent: dmsc  
 Data collected on: May 29 2012

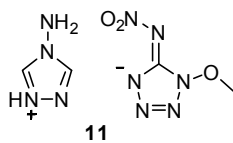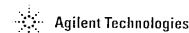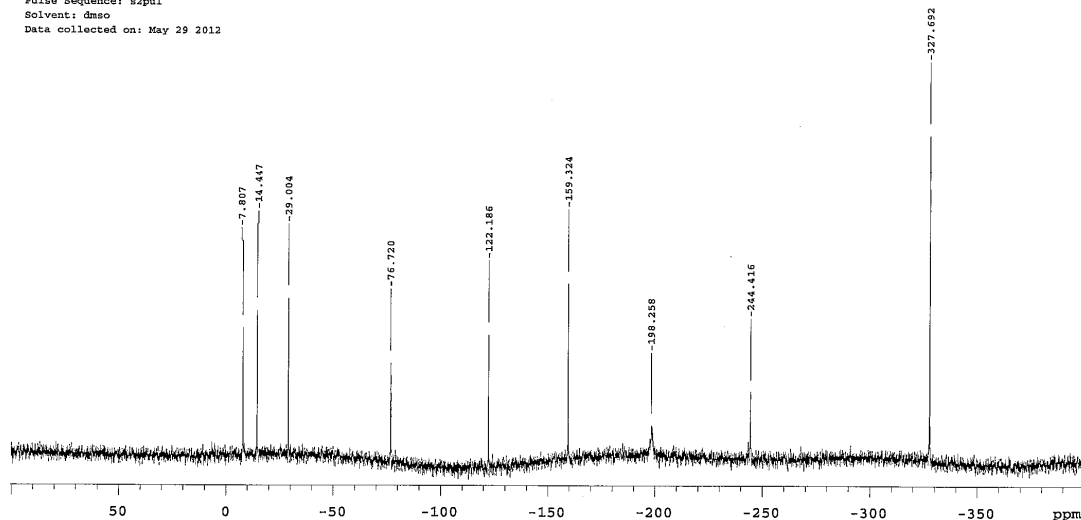



# <sup>1</sup>H NMR

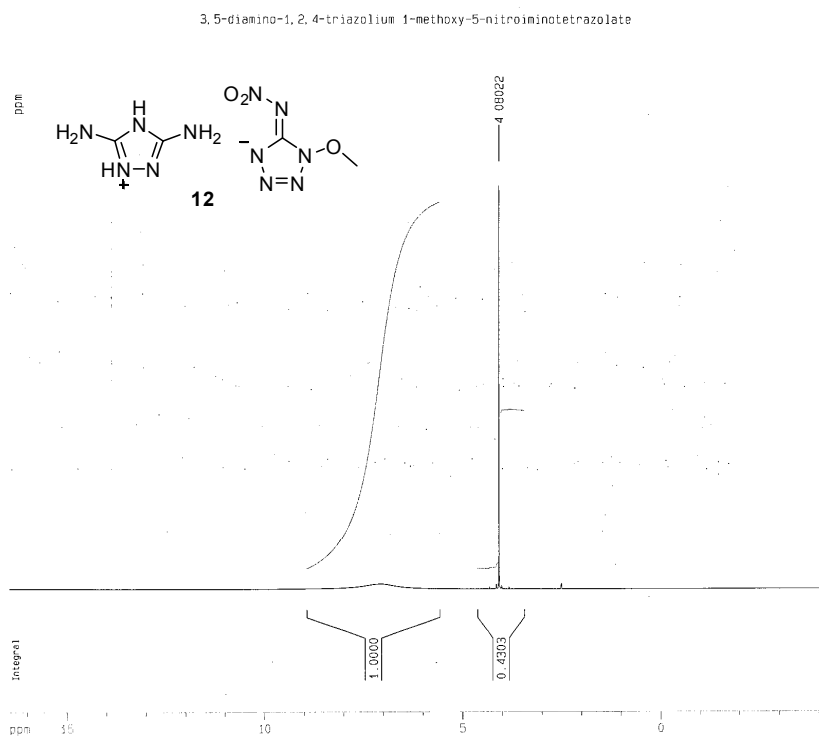

# <sup>13</sup>C NMR

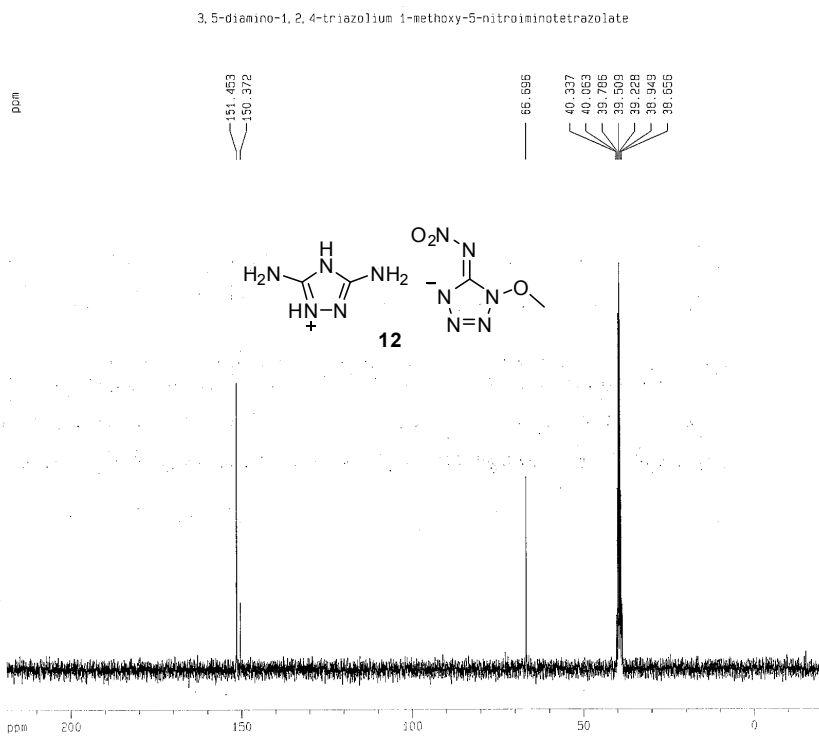

# <sup>15</sup>N NMR

3,5-DAT-MNLT

Sample Name:

Data Collected on:

Agilent-NMR-vnmr600

Archive directory:

Sample directory:

FidFile: N15

Pulse Sequence: s2pul

Solvent: dmsc

Data collected on: May 31 2012

Agilent Technologies

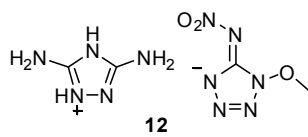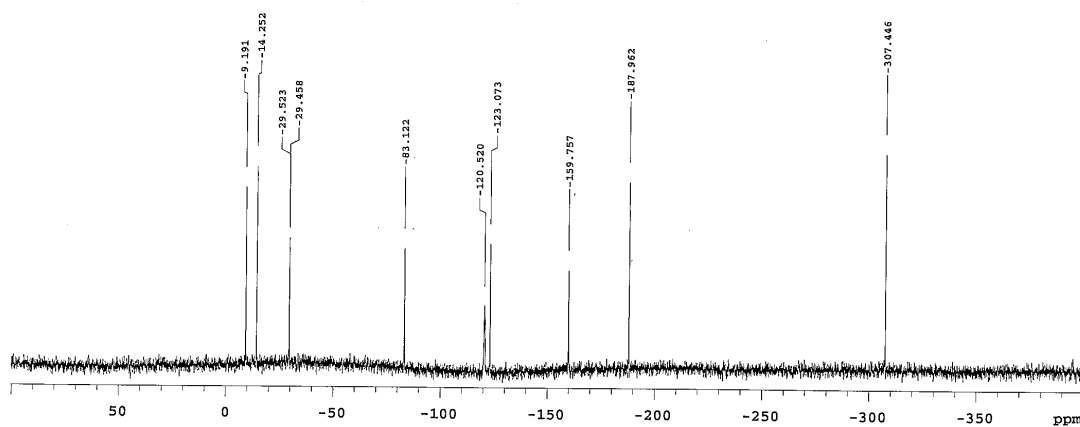



### X-ray information

**Compound 5** (thermal displacement set at 50% probability)

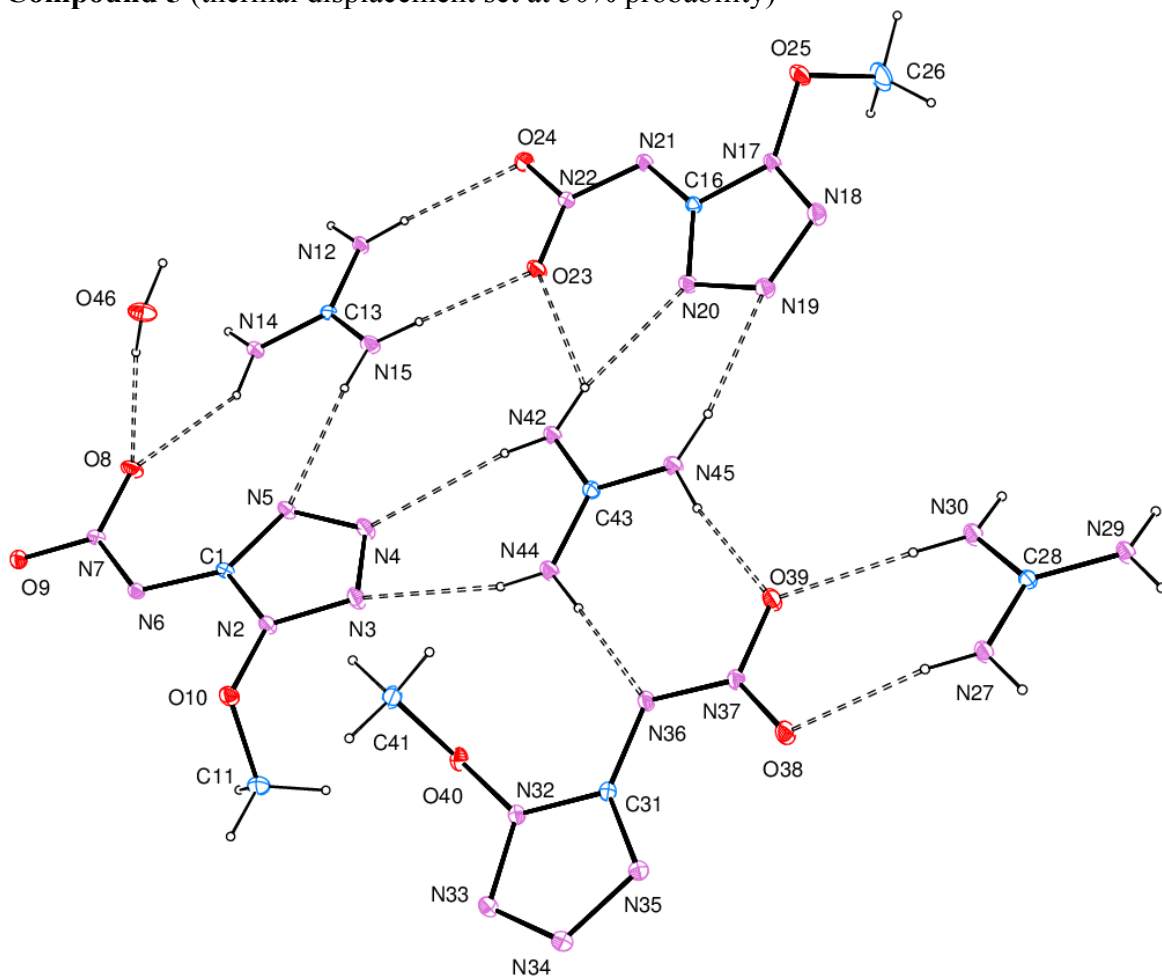

**Compound 6** (thermal displacement set at 50% probability)

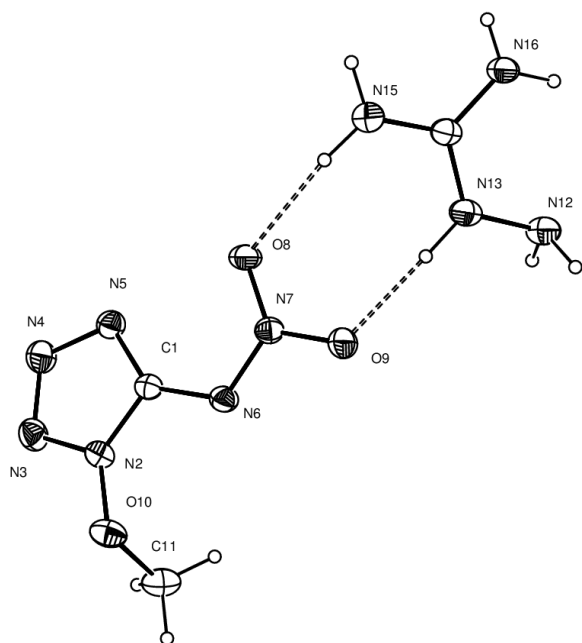

**Compound** (thermal displacement set at 50% probability)

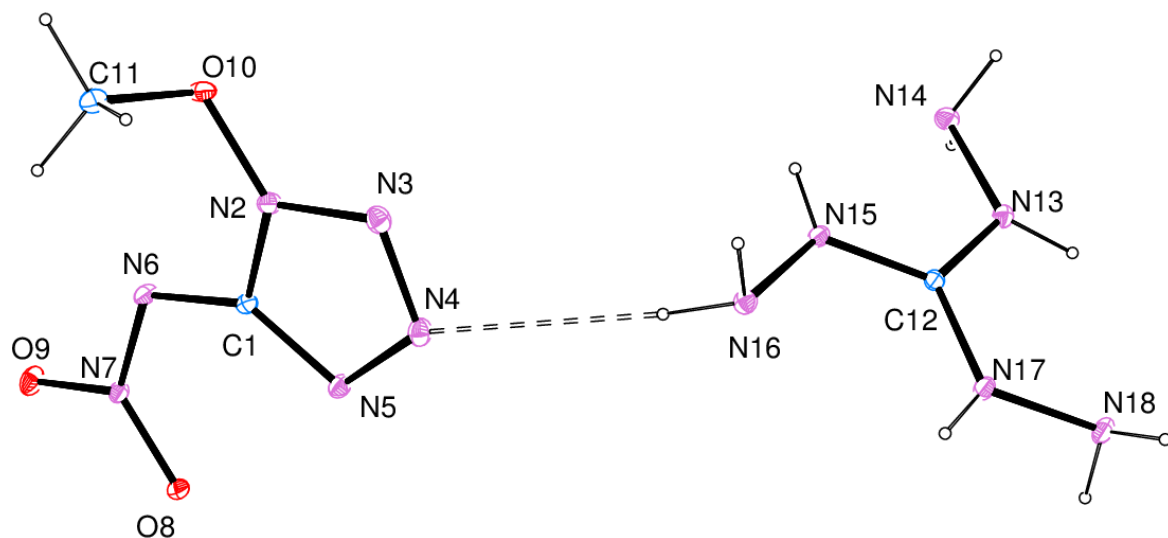

**Compound 9** (thermal displacement set at 50% probability)

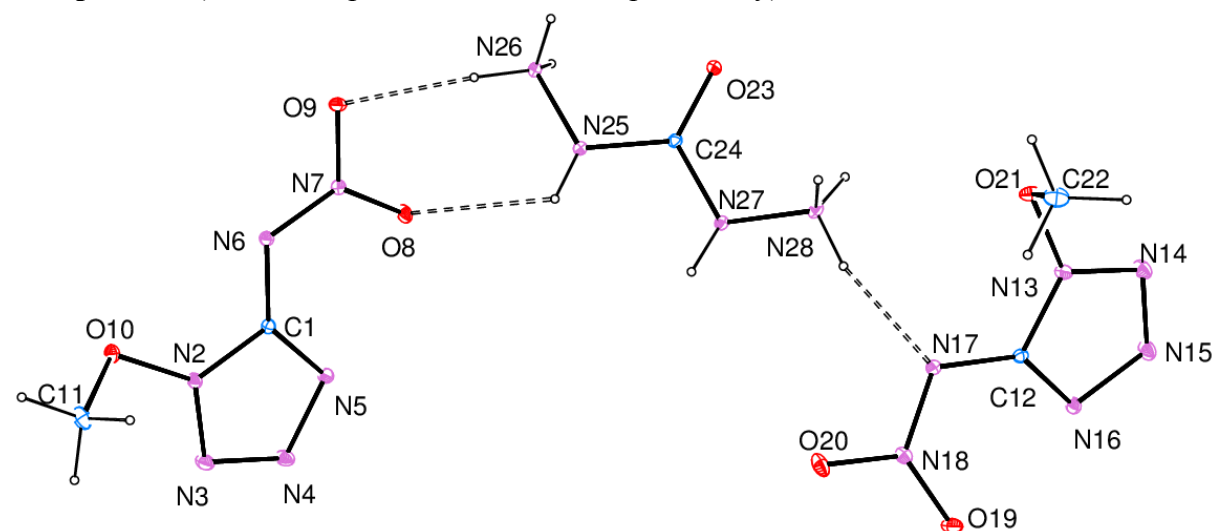

**Compound 10** (thermal displacement set at 50% probability)

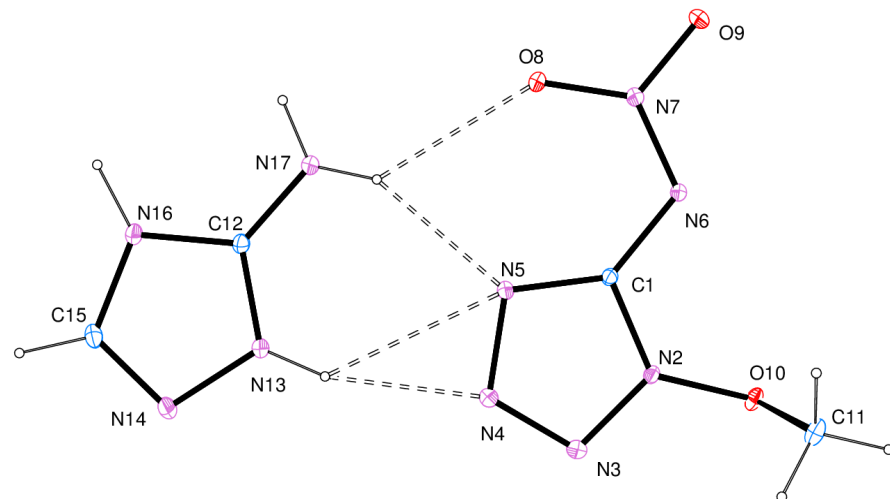

**Compound 11** (thermal displacement set at 50% probability)

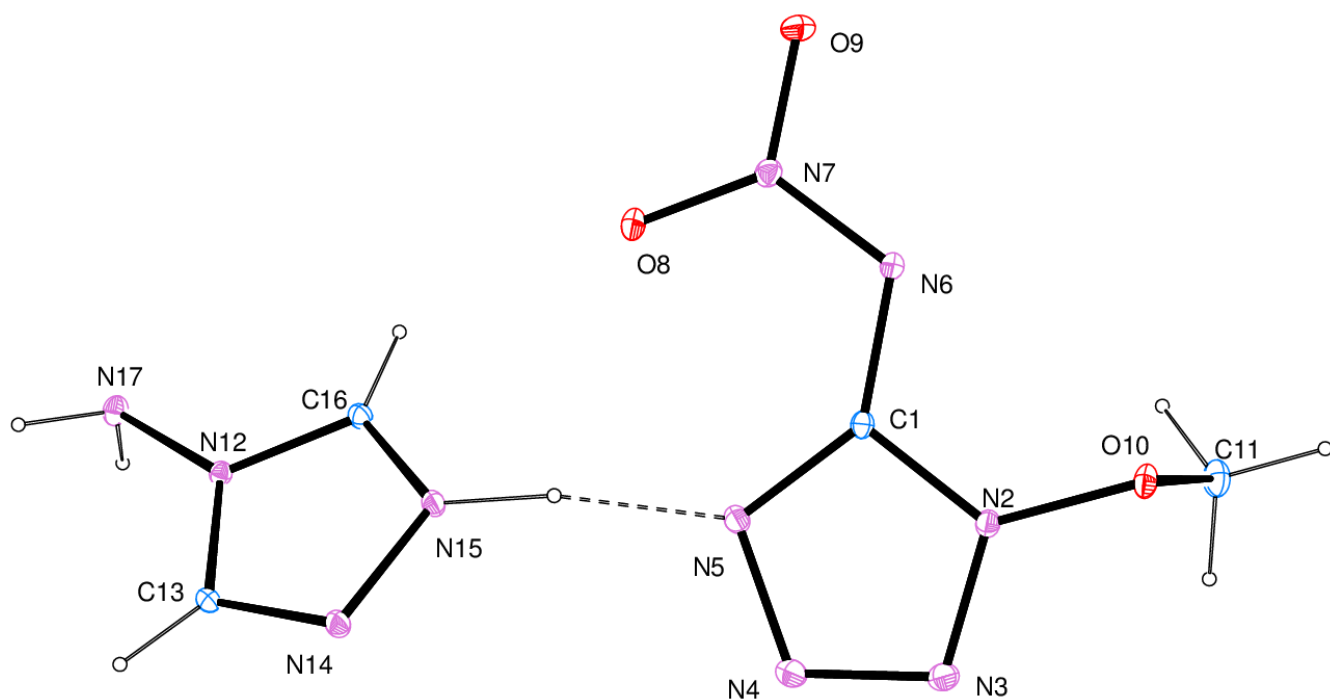

## Computation information

**Theoretical study.** Calculations were carried out by using the Gaussian 03 (Revision D.01) suite of programs. The geometric optimization of the structures and frequency analyses were carried out by using the B3LYP functional with the 6-31+G\*\* basis set,<sup>[1]</sup> and single-point energies were calculated at the MP2/6-311++G\*\* level. All of the optimized structures were characterized to be true local energy minima on the potential-energy surface without having imaginary frequencies.

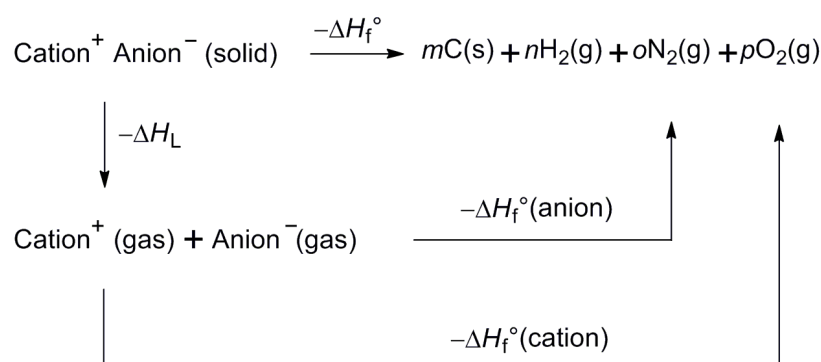

Figure S1. Born-Haber cycle for the formation of 1-methoxy-5-nitroiminotetrazole salts.

Based on Born-Haber energy cycles, heats of formation of ionic salts can be simplified by the formula [Eq. (1)]:

$$\Delta H_f^\circ (\text{ionic salt, 298 K}) = \Delta H_f^\circ (\text{cation, 298 K}) + \Delta H_f^\circ (\text{anion, 298 K}) - \Delta H_L \quad (1)$$

where  $\Delta H_L$  is the lattice energy of the ionic salt. The  $\Delta H_L$  value could be predicted by the formula suggested by Jenkins et al. [Equation (2)],<sup>[2]</sup> where  $U_{\text{POT}}$  is the lattice potential energy and  $n_M$  and  $n_X$  depend on the nature of the ions  $M_p^+$  and  $X_q^-$ , respectively, and are equal to three for monoatomic ions, five for linear polyatomic ions, and six for nonlinear polyatomic ions.

$$\Delta H_L = U_{\text{POT}} + [p(n_M / 2 - 2) + q(n_X / 2 - 2)]RT \quad (2)$$

The equation for the lattice potential energy,  $U_{\text{POT}}$ , takes the form of Equation (3),

$$U_{\text{POT}} (\text{kJ mol}^{-1}) = \gamma (\rho_{\text{m}}/M_{\text{m}})^{1/3} + \delta \quad (3)$$

where  $\rho_{\text{m}}$  is the density ( $\text{g cm}^{-3}$ ),  $M_{\text{m}}$  is the chemical formula mass of the ionic material (g), and the coefficients  $\gamma$  ( $\text{kJ mol}^{-1} \text{cm}$ ) and  $\delta$  ( $\text{kJ mol}^{-1}$ ) are assigned literature values.<sup>[15]</sup>

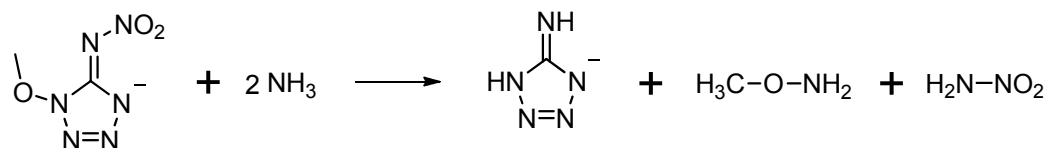

Scheme S1. Isodesmic reaction of 1-methoxy-nitroiminotetrazolate anion

Calculated (B3LYP/6-31+G\*\*//MP2/6-311++G\*\*) Total Energy ( $E_0$ ), Zero Point Energy (ZPE), Values of Thermal correction ( $H_{\text{T}}$ ), and Heats of Formation (HoF) [ $\text{kJ/mol}$ ] of the compounds.

|  |              |          |                |             |
|--|--------------|----------|----------------|-------------|
|  | $E_0$        | ZPE      | $H_{\text{T}}$ | HoF         |
|  | -630.6396716 | 0.01035  | 0.01260        | 315.92      |
|  | $E_0$        | ZPE      | $H_{\text{T}}$ | HoF         |
|  | -204.8735031 | 0.075945 | 0.005496       | 26.0        |
|  | $E_0$        | ZPE      | $H_{\text{T}}$ | HoF         |
|  | -260.5457263 | 0.114876 | 0.006227       | 566.7       |
|  | $E_0$        | ZPE      | $H_{\text{T}}$ | HoF         |
|  | -315.7583524 | 0.13361  | 0.007123       | 769.0176204 |
|  | $E_0$        | ZPE      | $H_{\text{T}}$ | HoF         |
|  | -370.9707208 | 0.152308 | 0.008131       | 871.4723014 |

## References

- [1] Parr, R. G.; Yang, W. *Density Functional Theory of Atoms and Molecules*, Oxford University Press, New York, **1989**.
- [2] Jenkins, H. D. B.; Tudela, D.; Glasser, L. *Inorg. Chem.* **2002**, *41*, 2364-2367.
